# Supplementary material for: Identifying Differentially Expressed Genes in Pollen from Self-Incompatible “Wuzishatangju” and Self-Compatible “Shatangju” Mandarins
Source: MDPI journal article supplement (doi:10.3390/ijms14048538), 2013-04-17

**Figure S1.** Partial PCR results of cloned fragments from F and R libraries. M, DL 2000 Marker; Lanes 1–48, PCR products of randomly selected clones using M13 primers from FSL; Lanes 49–96, PCR products of randomly selected clones using M13 primers from RSL.

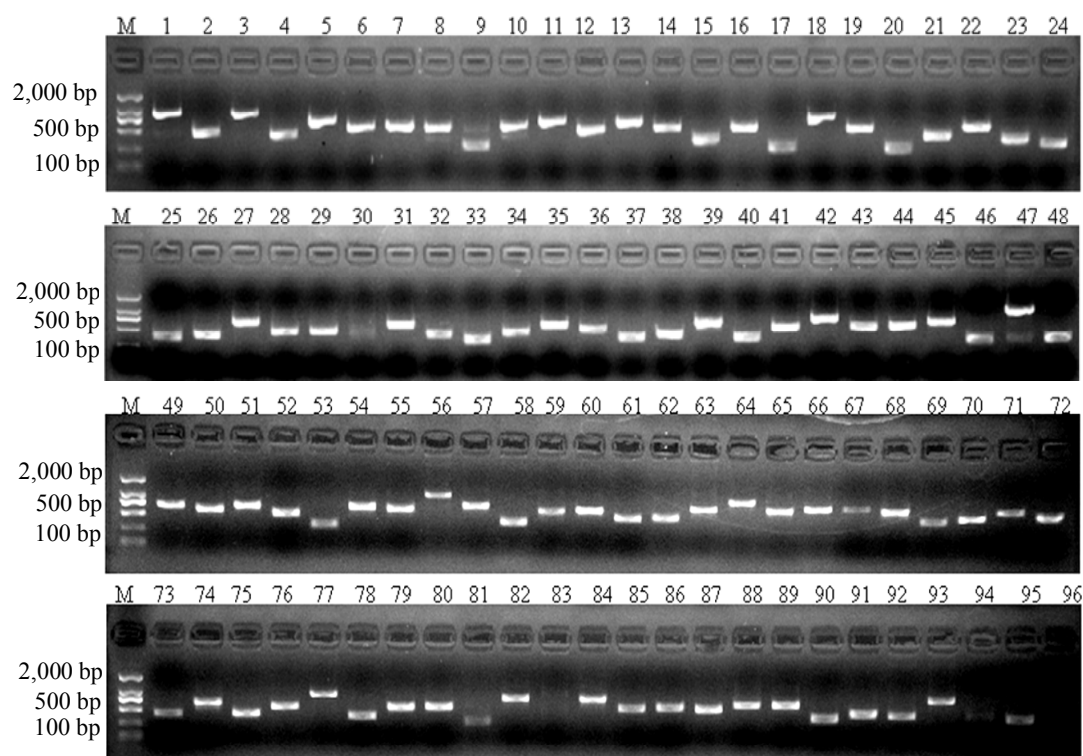

**Figure S2.** Partial reverse northern results of clones from F and R library. Hybridization with the DIG-labeled “Wuzishatangju” cDNA probe (A); hybridization with the DIG-labeled “Shatangju” cDNA probe (B); up-regulated clones in “Shatangju” mandarin was shown by arrows.

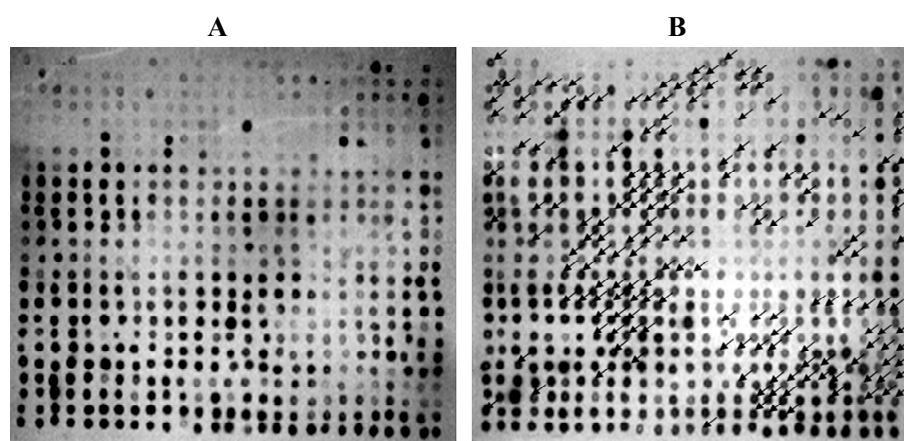

**Figure S3A.** Classification of SSH ESTs according to Gene Ontology criteria (Molecular Function). Gene Ontology analysis was carried out on the transcripts isolated from the two SSH libraries by Blast2GO program. The molecular Function combined graph was made based on ontology level 2.

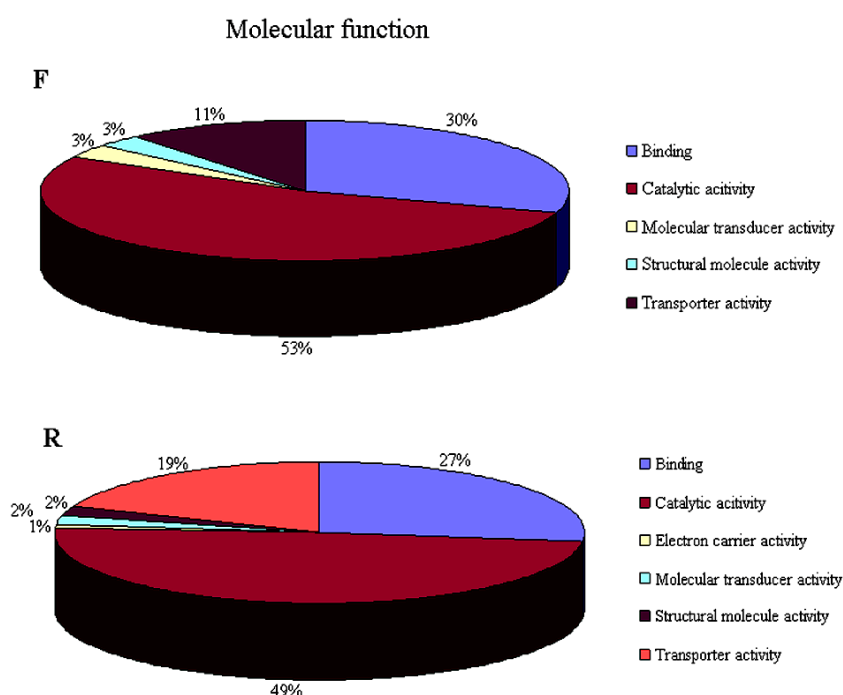

**Figure S3B.** Classification of SSH ESTs according to Gene Ontology criteria (Cellular Component). The Cellular Component combined graph was made based on ontology level 2 by Blast2GO.

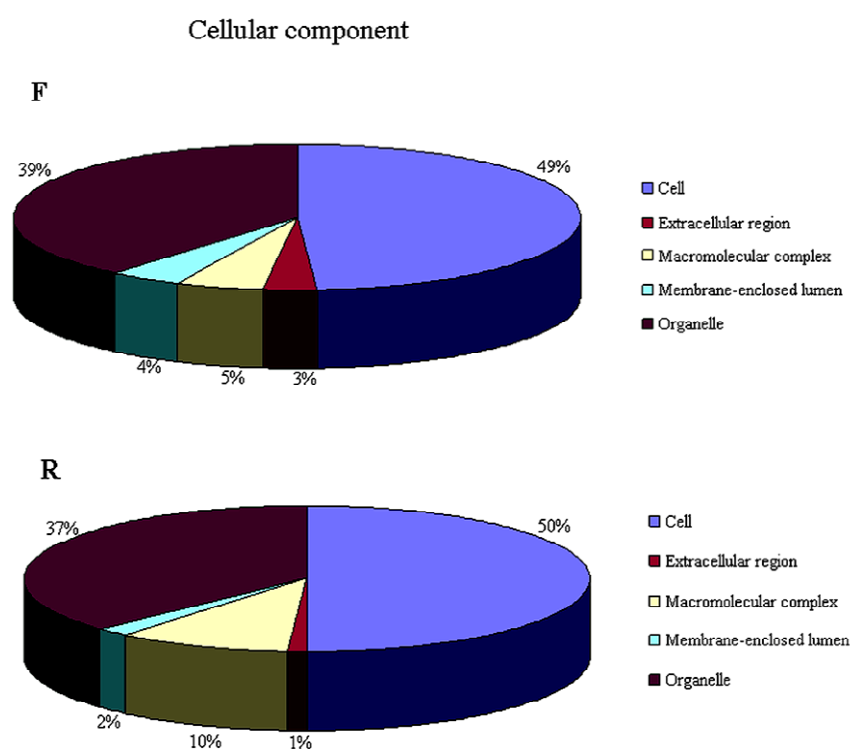

Supplement: s1 [file s1]
