# Supplementary material for: Identifying Differentially Expressed Genes in Pollen from Self-Incompatible “Wuzishatangju” and Self-Compatible “Shatangju” Mandarins
Source: MDPI journal article supplement (doi:10.3390/ijms14048538), 2013-04-17
Supplement: s1 [file s1]

Archive with 6 entries (6 files):
- Table S5.pdf
- Supplement Figures.pdf
- Table S1.pdf
- Table S2.xls
- Table S3.pdf
- Table S4.pdf
