# Supplementary material for: Identifying Differentially Expressed Genes in Pollen from Self-Incompatible “Wuzishatangju” and Self-Compatible “Shatangju” Mandarins
Source: MDPI journal article supplement (doi:10.3390/ijms14048538), 2013-04-17
Supplement: s1 [file s1]

**Table S3.** Expression analysis of all potential SI-candidate genes by SqRT-PCR.

| SI candidate genes | Expression levels in various tissues |   |   |   |   |    |     |     | Expression levels in different stages after self-pollination and cross-pollination |    |    |    |    |    |    |    |    |    |    |
|--------------------|--------------------------------------|---|---|---|---|----|-----|-----|------------------------------------------------------------------------------------|----|----|----|----|----|----|----|----|----|----|
| F library          |                                      | B | L | P | F | Po | Sti | Sty | O                                                                                  |    | 0h | 4h | 1d | 2d | 3d | 4d | 5d | 6d | 7d |
| H102               | A1                                   |   |   |   |   |    |     |     |                                                                                    | C1 |    |    |    |    |    |    |    |    |    |
|                    | A2                                   |   |   |   |   |    |     |     |                                                                                    | C2 |    |    |    |    |    |    |    |    |    |
| H115               | A1                                   |   |   |   |   |    |     |     |                                                                                    | C1 |    |    |    |    |    |    |    |    |    |
|                    | A2                                   |   |   |   |   |    |     |     |                                                                                    | C2 |    |    |    |    |    |    |    |    |    |
| H128               | A1                                   |   |   |   |   |    |     |     |                                                                                    | C1 |    |    |    |    |    |    |    |    |    |
|                    | A2                                   |   |   |   |   |    |     |     |                                                                                    | C2 |    |    |    |    |    |    |    |    |    |
| H264               | A1                                   |   |   |   |   |    |     |     |                                                                                    | C1 |    |    |    |    |    |    |    |    |    |
|                    | A2                                   |   |   |   |   |    |     |     |                                                                                    | C2 |    |    |    |    |    |    |    |    |    |
| H304               | A1                                   |   |   |   |   |    |     |     |                                                                                    | C1 |    |    |    |    |    |    |    |    |    |
|                    | A2                                   |   |   |   |   |    |     |     |                                                                                    | C2 |    |    |    |    |    |    |    |    |    |
| H428               | A1                                   |   |   |   |   |    |     |     |                                                                                    | C1 |    |    |    |    |    |    |    |    |    |
|                    | A2                                   |   |   |   |   |    |     |     |                                                                                    | C2 |    |    |    |    |    |    |    |    |    |
| H543               | A1                                   |   |   |   |   |    |     |     |                                                                                    | C1 |    |    |    |    |    |    |    |    |    |
|                    | A2                                   |   |   |   |   |    |     |     |                                                                                    | C2 |    |    |    |    |    |    |    |    |    |
| H556               | A1                                   |   |   |   |   |    |     |     |                                                                                    | C1 |    |    |    |    |    |    |    |    |    |
|                    | A2                                   |   |   |   |   |    |     |     |                                                                                    | C2 |    |    |    |    |    |    |    |    |    |
| H858               | A1                                   |   |   |   |   |    |     |     |                                                                                    | C1 |    |    |    |    |    |    |    |    |    |
|                    | A2                                   |   |   |   |   |    |     |     |                                                                                    | C2 |    |    |    |    |    |    |    |    |    |
| H1092              | A1                                   |   |   |   |   |    |     |     |                                                                                    | C1 |    |    |    |    |    |    |    |    |    |
|                    | A2                                   |   |   |   |   |    |     |     |                                                                                    | C2 |    |    |    |    |    |    |    |    |    |
| <b>R library</b>   |                                      |   |   |   |   |    |     |     |                                                                                    |    |    |    |    |    |    |    |    |    |    |
| F15                | A1                                   |   |   |   |   |    |     |     |                                                                                    | C1 |    |    |    |    |    |    |    |    |    |
|                    | A2                                   |   |   |   |   |    |     |     |                                                                                    | C2 |    |    |    |    |    |    |    |    |    |
| F65                | A1                                   |   |   |   |   |    |     |     |                                                                                    | C1 |    |    |    |    |    |    |    |    |    |
|                    | A2                                   |   |   |   |   |    |     |     |                                                                                    | C2 |    |    |    |    |    |    |    |    |    |
| F78                | A1                                   |   |   |   |   |    |     |     |                                                                                    | C1 |    |    |    |    |    |    |    |    |    |
|                    | A2                                   |   |   |   |   |    |     |     |                                                                                    | C2 |    |    |    |    |    |    |    |    |    |
| F960               | A1                                   |   |   |   |   |    |     |     |                                                                                    | C1 |    |    |    |    |    |    |    |    |    |
|                    | A2                                   |   |   |   |   |    |     |     |                                                                                    | C2 |    |    |    |    |    |    |    |    |    |
| F966               | A1                                   |   |   |   |   |    |     |     |                                                                                    | C1 |    |    |    |    |    |    |    |    |    |
|                    | A2                                   |   |   |   |   |    |     |     |                                                                                    | C2 |    |    |    |    |    |    |    |    |    |
| F1166              | A1                                   |   |   |   |   |    |     |     |                                                                                    | C1 |    |    |    |    |    |    |    |    |    |
|                    | A2                                   |   |   |   |   |    |     |     |                                                                                    | C2 |    |    |    |    |    |    |    |    |    |
| F250               | A1                                   |   |   |   |   |    |     |     |                                                                                    | C1 |    |    |    |    |    |    |    |    |    |
|                    | A2                                   |   |   |   |   |    |     |     |                                                                                    | C2 |    |    |    |    |    |    |    |    |    |
| F465               | A1                                   |   |   |   |   |    |     |     |                                                                                    | C1 |    |    |    |    |    |    |    |    |    |
|                    | A2                                   |   |   |   |   |    |     |     |                                                                                    | C2 |    |    |    |    |    |    |    |    |    |
| F499               | A1                                   |   |   |   |   |    |     |     |                                                                                    | C1 |    |    |    |    |    |    |    |    |    |
|                    | A2                                   |   |   |   |   |    |     |     |                                                                                    | C2 |    |    |    |    |    |    |    |    |    |
| F519               | A1                                   |   |   |   |   |    |     |     |                                                                                    | C1 |    |    |    |    |    |    |    |    |    |
|                    | A2                                   |   |   |   |   |    |     |     |                                                                                    | C2 |    |    |    |    |    |    |    |    |    |
| F546               | A1                                   |   |   |   |   |    |     |     |                                                                                    | C1 |    |    |    |    |    |    |    |    |    |
|                    | A2                                   |   |   |   |   |    |     |     |                                                                                    | C2 |    |    |    |    |    |    |    |    |    |

Table S3. Cont.

| SI candidate genes | Expression levels in various tissues |  |  |  |  |  | Expression levels in different stages after self-pollination and cross-pollination |    |  |  |  |  |  |  |
|--------------------|--------------------------------------|--|--|--|--|--|------------------------------------------------------------------------------------|----|--|--|--|--|--|--|
| R library          |                                      |  |  |  |  |  |                                                                                    |    |  |  |  |  |  |  |
| F1019              | A1                                   |  |  |  |  |  |                                                                                    | C1 |  |  |  |  |  |  |
|                    | A2                                   |  |  |  |  |  |                                                                                    | C2 |  |  |  |  |  |  |
| F580               | A1                                   |  |  |  |  |  |                                                                                    | C1 |  |  |  |  |  |  |
|                    | A2                                   |  |  |  |  |  |                                                                                    | C2 |  |  |  |  |  |  |
| F685               | A1                                   |  |  |  |  |  |                                                                                    | C1 |  |  |  |  |  |  |
|                    | A2                                   |  |  |  |  |  |                                                                                    | C2 |  |  |  |  |  |  |
| F822               | A1                                   |  |  |  |  |  |                                                                                    | C1 |  |  |  |  |  |  |
|                    | A2                                   |  |  |  |  |  |                                                                                    | C2 |  |  |  |  |  |  |

A1, “Wuzishatangju”; A2, “Shatangju”; C1, “Wuzishatangj” × “Wuzishatangju”; C2, “Wuzishatangju” × “Shatangju”; B, Buds; L, Leaves; P, Petals; F, Filaments; Po, Pollen; Sti, Stigmas; Sty, Styles; O, Ovaries.
