# Supplementary material for: Identifying Differentially Expressed Genes in Pollen from Self-Incompatible “Wuzishatangju” and Self-Compatible “Shatangju” Mandarins
Source: MDPI journal article supplement (doi:10.3390/ijms14048538), 2013-04-17
Supplement: s1 [file s1 › Table S1.pdf]

**Table S1.** Checklist of known genes in the F library and R library.

| Seq. Name | Seq. Description                                                        | Length | #Hits | E-value   | Similarity |
|-----------|-------------------------------------------------------------------------|--------|-------|-----------|------------|
| H543      | Zinc finger protein                                                     | 372    | 20    | 4.58E-33  | 69.80%     |
| H884      | Xyloglucan<br>endotransglycosylase-related<br>protein XTR-7             | 309    | 20    | 1.87E-34  | 75.60%     |
| H1092     | Vacuolar H <sup>+</sup> -translocating<br>inorganic pyrophosphatase     | 482    | 16    | 1.33E-05  | 64.56%     |
| H684      | Uncharacterized protein                                                 | 247    | 20    | 7.28E-39  | 77.30%     |
| H767      | Uncharacterized protein                                                 | 641    | 2     | 7.24E-05  | 38.00%     |
| H779      | Uncharacterized protein                                                 | 641    | 2     | 7.24E-05  | 38.00%     |
| H690      | Uncharacterized protein                                                 | 640    | 20    | 1.83E-96  | 78.25%     |
| H556      | Ubiquitin-protein ligase E3                                             | 471    | 20    | 1.44E-62  | 95.00%     |
| H858      | Ubiquitin-conjugating enzyme E2                                         | 314    | 20    | 1.58E-35  | 97.30%     |
| H1207     | Sugar transport protein 14                                              | 447    | 20    | 1.47E-56  | 87.50%     |
| H545      | Sugar transport protein 14                                              | 428    | 20    | 8.71E-51  | 87.85%     |
| H572      | Soluble inorganic pyrophosphatase                                       | 393    | 20    | 3.04E-66  | 97.55%     |
| H264      | Senescence-associated protein                                           | 252    | 20    | 1.07E-36  | 89.95%     |
| H348      | Senescence-associated protein                                           | 340    | 20    | 7.04E-59  | 96.90%     |
| H583      | Ring-h2 finger protein                                                  | 431    | 20    | 2.89E-42  | 86.55%     |
| H1065     | RIN4-like protein                                                       | 517    | 20    | 2.61E-34  | 57.05%     |
| H521      | Reversibly glycosylated<br>polypeptide                                  | 700    | 20    | 5.46E-157 | 95.15%     |
| H1174     | Receptor-like cytosolic serine<br>threonine-protein kinase<br>RBK1-like | 326    | 20    | 1.84E-31  | 72.50%     |
| H597      | Rapid alkalization factor                                               | 192    | 20    | 1.90E-12  | 68.45%     |
| H1038     | RAB-like protein                                                        | 689    | 20    | 2.35E-53  | 95.15%     |
| H1234     | RAB-like protein                                                        | 689    | 20    | 2.35E-53  | 95.15%     |
| H283      | Proton pump interactor 1                                                | 862    | 20    | 6.57E-93  | 78.00%     |
| H1037     | Protein cobra                                                           | 515    | 20    | 7.13E-36  | 72.60%     |
| H1024     | Uncharacterized protein                                                 | 539    | 20    | 1.65E-37  | 58.40%     |
| H1208     | Uncharacterized protein                                                 | 547    | 20    | 4.02E-36  | 57.70%     |
| H164      | Uncharacterized protein                                                 | 572    | 20    | 1.50E-40  | 57.85%     |
| H226      | Uncharacterized protein                                                 | 487    | 20    | 2.23E-31  | 86.55%     |
| H699      | Uncharacterized protein                                                 | 252    | 20    | 5.06E-11  | 64.70%     |
| H770      | Uncharacterized protein                                                 | 545    | 20    | 4.02E-36  | 57.70%     |
| H782      | Uncharacterized protein                                                 | 545    | 20    | 4.02E-36  | 57.70%     |
| H889      | Uncharacterized protein                                                 | 451    | 20    | 5.76E-31  | 86.40%     |
| H1099     | Probable polyol transporter 3-like                                      | 363    | 20    | 4.27E-30  | 83.75%     |
| H102      | Pollen coat-like protein                                                | 488    | 20    | 2.23E-31  | 86.55%     |
| H128      | Pollen allergen Pla o1                                                  | 526    | 20    | 1.80E-35  | 57.85%     |
| H1206     | Pectin esterase PPME1-like                                              | 1245   | 20    | 6.00E-87  | 79.05%     |
| H1019     | Pectate lyase-like                                                      | 481    | 16    | 1.29E-05  | 64.56%     |

Table S1. *Cont.*

| Seq. Name | Seq. Description                                                   | Length | #Hits | E-value   | Similarity |
|-----------|--------------------------------------------------------------------|--------|-------|-----------|------------|
| H1128     | Pectate lyase-like                                                 | 654    | 20    | 5.51E-29  | 66.90%     |
| H708      | Pectate lyase-like                                                 | 549    | 20    | 3.56E-14  | 67.65%     |
| H761      | Pectate lyase-like                                                 | 634    | 20    | 3.69E-25  | 67.10%     |
| H813      | Pectate lyase-like                                                 | 489    | 20    | 5.54E-06  | 66.70%     |
| H868      | Pectate lyase family protein                                       | 848    | 20    | 2.95E-61  | 70.80%     |
| H293      | Pectate lyase                                                      | 955    | 20    | 6.23E-80  | 72.30%     |
| H783      | Pectate lyase                                                      | 882    | 20    | 1.51E-65  | 70.90%     |
| H1191     | NADH dehydrogenase                                                 | 701    | 20    | 1.56E-67  | 81.80%     |
| H865      | Monosaccharide transporter                                         | 263    | 20    | 9.97E-19  | 86.85%     |
| H984      | Monosaccharide transporter                                         | 266    | 20    | 4.46E-17  | 86.95%     |
| H986      | Mitochondrial processing<br>peptidase                              | 684    | 20    | 2.87E-64  | 94.85%     |
| H580      | MADS box                                                           | 441    | 20    | 2.58E-48  | 89.95%     |
| H431      | Glycosyl transferase                                               | 180    | 20    | 6.89E-26  | 94.65%     |
| H748      | Glucan endo- $\beta$ -glucosidase                                  | 333    | 20    | 1.02E-35  | 69.35%     |
| H1125     | GDP-D-mannose-3 -epimerase                                         | 863    | 20    | 2.31E-149 | 98.30%     |
| H933      | GDP-D-mannose-3 -epimerase                                         | 863    | 20    | 2.31E-149 | 98.30%     |
| H1166     | Fructose-bisphosphate                                              | 389    | 20    | 7.16E-68  | 94.15%     |
| H304      | F-box family protein                                               | 446    | 20    | 3.04E-23  | 87.80%     |
| H997      | Endo- $\alpha$ -glucanase                                          | 503    | 20    | 2.77E-70  | 79.50%     |
| H409      | DNA double-strand break repair<br>Rad 50                           | 554    | 11    | 6.39E-12  | 59.73%     |
| H447      | Carbonic anhydrase                                                 | 561    | 20    | 1.05E-57  | 67.35%     |
| H115      | Calcium-dependent phospholipid<br>binding protein                  | 805    | 20    | 3.67E-112 | 86.40%     |
| H749      | $\beta$ -galactosidase 7-like                                      | 342    | 20    | 6.16E-26  | 68.70%     |
| H549      | $\beta$ -glucanase                                                 | 410    | 20    | 4.27E-37  | 68.30%     |
| H601      | Aldose 1-epimerase                                                 | 656    | 20    | 5.18E-70  | 76.80%     |
| H931      | Aldose 1-epimerase                                                 | 277    | 20    | 3.43E-13  | 85.50%     |
| H576      | Adenylate translocator                                             | 439    | 20    | 3.96E-25  | 94.05%     |
| H428      | Actin depolymerizing                                               | 612    | 20    | 6.19E-85  | 93.75%     |
| H557      | 60s acidic ribosomal protein                                       | 671    | 20    | 3.59E-28  | 86.75%     |
| F580      | Zinc finger (C <sub>2</sub> H <sub>2</sub> type) family<br>protein | 373    | 20    | 3.56E-22  | 75.20%     |
| F822      | WD-40 repeat protein-like                                          | 465    | 20    | 6.61E-41  | 94.25%     |
| F279      | Universal stress protein family<br>protein                         | 596    | 20    | 1.86E-47  | 87.75%     |
| F883      | Universal stress protein family<br>protein                         | 595    | 20    | 7.51E-47  | 87.35%     |
| F197      | Sugar transport protein 14                                         | 447    | 20    | 1.47E-56  | 87.50%     |
| F277      | Sugar transport protein 14                                         | 447    | 20    | 1.47E-56  | 87.50%     |
| F303      | Sugar transport protein 14                                         | 372    | 20    | 3.10E-57  | 86.25%     |
| F304      | Sugar transport protein 14                                         | 567    | 20    | 6.63E-81  | 85.25%     |

Table S1. *Cont.*

| Seq. Name | Seq. Description                                                  | Length | #Hits | E-value  | Similarity |
|-----------|-------------------------------------------------------------------|--------|-------|----------|------------|
| F354      | Sugar transport protein 14                                        | 447    | 20    | 1.47E-56 | 87.50%     |
| F573      | Sugar transport protein 14                                        | 567    | 20    | 6.63E-81 | 85.25%     |
| F647      | Sugar transport protein 14                                        | 568    | 20    | 6.63E-81 | 85.25%     |
| F1197     | Sugar transport protein                                           | 606    | 20    | 1.94E-97 | 82.50%     |
| F477      | Sugar transport protein                                           | 251    | 20    | 9.39E-17 | 86.80%     |
| F905      | Sugar transport protein                                           | 501    | 20    | 1.08E-78 | 83.50%     |
| F960      | Sexual differentiation process protein isp4-like                  | 840    | 20    | 7.23E-67 | 83.80%     |
| F1234     | Self-incompatibility S1 family protein                            | 440    | 12    | 1.38E-09 | 62.83%     |
| F78       | Self-incompatibility S1 family protein                            | 440    | 12    | 1.38E-09 | 62.83%     |
| F91       | Self-incompatibility S1 family protein                            | 441    | 12    | 1.38E-09 | 62.83%     |
| F966      | Seed maturation protein PM37                                      | 246    | 20    | 5.47E-26 | 87.90%     |
| F465      | Ribonuclease HII family protein                                   | 344    | 17    | 6.15E-18 | 77.24%     |
| F666      | Ribonuclease H2, subunit a                                        | 345    | 17    | 6.15E-18 | 77.24%     |
| F785      | Ribonuclease H2, subunit a                                        | 345    | 17    | 6.15E-18 | 77.24%     |
| F1002     | Receptor-like cytosolic serine threonine-protein kinase RAB1-like | 244    | 20    | 4.51E-22 | 72.25%     |
| F391      | RAB1-like protein                                                 | 689    | 20    | 2.35E-53 | 95.15%     |
| F327      | Protein-tyrosine-phosphatase IBR5                                 | 239    | 20    | 2.55E-29 | 80.05%     |
| F503      | Protein SKU5-like 11                                              | 443    | 20    | 2.06E-70 | 85.20%     |
| F869      | Protein RER1B                                                     | 394    | 20    | 1.19E-49 | 88.90%     |
| F1001     | Uncharacterized protein                                           | 479    | 20    | 2.08E-36 | 85.60%     |
| F1031     | Uncharacterized protein                                           | 543    | 20    | 3.42E-37 | 58.75%     |
| F1032     | Uncharacterized protein                                           | 339    | 20    | 6.79E-52 | 82.15%     |
| F1057     | Uncharacterized protein                                           | 448    | 20    | 5.56E-31 | 86.40%     |
| F1072     | Uncharacterized protein                                           | 436    | 20    | 7.87E-17 | 59.65%     |
| F1169     | Uncharacterized protein                                           | 422    | 20    | 1.18E-57 | 77.75%     |
| F1238     | Uncharacterized protein                                           | 334    | 20    | 6.41E-17 | 68.45%     |
| F269      | Uncharacterized protein                                           | 424    | 18    | 6.88E-15 | 59.83%     |
| F350      | Uncharacterized protein                                           | 465    | 20    | 1.24E-18 | 74.65%     |
| F447      | Uncharacterized protein                                           | 546    | 20    | 4.16E-36 | 57.70%     |
| F475      | Uncharacterized protein                                           | 338    | 20    | 2.57E-51 | 82.65%     |
| F586      | Uncharacterized protein                                           | 548    | 20    | 4.16E-36 | 57.70%     |
| F637      | Uncharacterized protein                                           | 292    | 20    | 1.76E-35 | 90.10%     |
| F839      | Uncharacterized protein                                           | 364    | 14    | 1.54E-13 | 65.64%     |
| F922      | Uncharacterized protein                                           | 229    | 19    | 1.76E-08 | 68.47%     |
| F972      | Uncharacterized protein                                           | 393    | 20    | 2.66E-19 | 75.65%     |
| F1029     | Probable polyol transporter 3-like                                | 366    | 20    | 4.43E-30 | 83.75%     |
| F1415     | Probable $\beta$ -d-xylosidase 5-like                             | 231    | 10    | 3.09E-15 | 68.20%     |

**Table S1. Cont.**

| <b>Seq. Name</b> | <b>Seq. Description</b>                                     | <b>Length</b> | <b>#Hits</b> | <b>E-value</b> | <b>Similarity</b> |
|------------------|-------------------------------------------------------------|---------------|--------------|----------------|-------------------|
| F546             | Pollen allergen Che a 1 precursor                           | 260           | 20           | 1.67E-14       | 64.50%            |
| F15              | Phospholipase                                               | 248           | 20           | 7.28E-39       | 77.30%            |
| F800             | Pectinesterase 11                                           | 472           | 20           | 1.27E-64       | 75.80%            |
| F1030            | Pectate lyase-like                                          | 636           | 20           | 9.28E-26       | 65.35%            |
| F18              | Pectate lyase-like                                          | 489           | 20           | 5.54E-06       | 66.70%            |
| F240             | Pectate lyase-like                                          | 483           | 16           | 1.33E-05       | 64.56%            |
| F341             | Pectate lyase-like                                          | 652           | 20           | 5.51E-29       | 66.90%            |
| F338             | Pectate lyase family protein                                | 847           | 20           | 2.95E-61       | 70.80%            |
| F185             | Pectate lyase                                               | 1235          | 20           | 1.40E-84       | 72.75%            |
| F251             | Pectate lyase                                               | 338           | 20           | 4.80E-21       | 63.75%            |
| F339             | Pectate lyase                                               | 883           | 20           | 6.66E-67       | 71.35%            |
| F437             | Pectate lyase                                               | 885           | 20           | 2.54E-67       | 71.15%            |
| F466             | Pectate lyase                                               | 1163          | 20           | 6.50E-97       | 73.85%            |
| F987             | Pectate lyase                                               | 487           | 20           | 5.54E-06       | 66.75%            |
| F1056            | Mitogen-activated protein kinase 13                         | 573           | 20           | 2.46E-19       | 53.90%            |
| F317             | Magnesium transporter                                       | 427           | 20           | 4.55E-52       | 80.90%            |
| F365             | Lysosomal $\beta$ -glucosidase-like                         | 338           | 20           | 2.32E-46       | 84.10%            |
| F481             | Lysosomal $\beta$ -glucosidase-like                         | 220           | 20           | 3.03E-26       | 89.30%            |
| F830             | Lysosomal $\beta$ -glucosidase-like                         | 575           | 20           | 1.20E-87       | 80.45%            |
| F1271            | Lysine histidine transporter 1                              | 567           | 20           | 2.10E-78       | 73.95%            |
| F870             | Low-temperature-induced 65 kDa protein                      | 478           | 19           | 1.57E-27       | 54.37%            |
| F111             | Hypothetical protein                                        | 366           | 1            | 2.31E-04       | 68.00%            |
| F1003            | Hypothetical protein                                        | 638           | 2            | 1.89E-17       | 61.50%            |
| F535             | Hypothetical protein                                        | 637           | 2            | 1.84E-17       | 61.50%            |
| F392             | Hexose transporter                                          | 351           | 20           | 6.03E-33       | 84.50%            |
| F843             | Heat shock protein 70 kDa                                   | 282           | 20           | 4.60E-48       | 92.10%            |
| F446             | Glycerophosphoryl diester phosphodiesterase family protein  | 357           | 20           | 9.95E-30       | 72.75%            |
| F1015            | Glucan endo- $\beta$ -glucosidase                           | 691           | 20           | 5.72E-99       | 72.05%            |
| F786             | Glucan endo- $\beta$ -glucosidase                           | 251           | 20           | 1.54E-15       | 59.30%            |
| F302             | Gibberellin receptor                                        | 236           | 20           | 6.19E-23       | 67.30%            |
| F374             | Gibberellin receptor                                        | 236           | 20           | 6.19E-23       | 67.30%            |
| F641             | Galactose oxidase-like                                      | 361           | 2            | 3.76E-04       | 79.50%            |
| F799             | Galactose oxidase-like                                      | 361           | 2            | 3.76E-04       | 79.50%            |
| F611             | Flavanone 3-hydroxylase                                     | 798           | 20           | 0              | 97.00%            |
| F65              | F-box and wd40 domain protein                               | 339           | 20           | 6.79E-52       | 82.15%            |
| F248             | ERD (early-responsive to dehydration stress) family protein | 196           | 6            | 1.30E-06       | 70.17%            |
| F1110            | $\delta$ -8 sphingolipid desaturase                         | 516           | 20           | 1.92E-52       | 92.70%            |
| F396             | $\delta$ -8 sphingolipid desaturase                         | 612           | 20           | 2.29E-103      | 90.90%            |

Table S1. *Cont.*

| Seq. Name | Seq. Description                                                 | Length | #Hits | E-value   | Similarity |
|-----------|------------------------------------------------------------------|--------|-------|-----------|------------|
| F471      | Cysteine protease                                                | 246    | 20    | 1.58E-35  | 97.30%     |
| F331      | Copper chaperone                                                 | 764    | 13    | 1.17E-23  | 76.69%     |
| F418      | Copper chaperone                                                 | 294    | 13    | 9.18E-26  | 76.31%     |
| F1019     | Cell wall invertase                                              | 420    | 20    | 9.75E-50  | 83.65%     |
| F425      | CBS domain-containing protein<br>CBSX5                           | 344    | 8     | 6.11E-07  | 82.38%     |
| F120      | Carbonic anhydrase                                               | 380    | 20    | 7.71E-31  | 64.45%     |
| F170      | Carbonic anhydrase                                               | 380    | 20    | 7.71E-31  | 64.45%     |
| F225      | Carbonic anhydrase                                               | 357    | 20    | 4.88E-29  | 64.90%     |
| F815      | Carbonic anhydrase                                               | 473    | 20    | 6.71E-46  | 66.50%     |
| F603      | Calcium-dependent lipid-binding<br>domain-containing protein     | 454    | 20    | 2.98E-36  | 78.70%     |
| F1166     | Ca <sup>2+</sup> -dependent membrane-<br>binding protein annexin | 212    | 20    | 1.25E-23  | 87.50%     |
| F1445     | $\beta$ -galactosidase 7-like                                    | 342    | 20    | 5.93E-26  | 69.20%     |
| F553      | $\beta$ -cell wall isozyme                                       | 222    | 20    | 1.75E-14  | 81.40%     |
| F937      | $\beta$ -cell wall isozyme                                       | 221    | 20    | 1.75E-14  | 81.40%     |
| F947      | $\beta$ -cell wall isozyme                                       | 221    | 20    | 1.75E-14  | 81.40%     |
| F11       | Basic form of pathogenesis -related<br>protein 1-like            | 271    | 8     | 2.25E-05  | 61.63%     |
| F685      | Auxin-repressed protein                                          | 595    | 3     | 1.18E-09  | 61.67%     |
| F731      | Aquaporin NIP1-2                                                 | 348    | 20    | 4.95E-21  | 90.75%     |
| F896      | Aquaporin NIP1-2                                                 | 614    | 20    | 2.15E-113 | 91.05%     |
| F499      | Anther-specific protein LAT52<br>precursor                       | 181    | 5     | 1.67E-06  | 70.80%     |
| F250      | $\alpha$ -glucosidase inhibitor                                  | 420    | 20    | 9.75E-50  | 83.65%     |
| F636      | Alpha/beta fold family protein                                   | 359    | 20    | 3.10E-53  | 86.45%     |
| F965      | Adenylate translocator                                           | 438    | 20    | 3.83E-25  | 94.05%     |
| F519      | Actin 3                                                          | 692    | 20    | 4.47E-134 | 99.50%     |
| F1127     | Actin                                                            | 692    | 20    | 4.47E-134 | 99.50%     |
| F719      | Actin                                                            | 692    | 20    | 4.47E-134 | 99.50%     |
| F938      | Acid phosphatase 1                                               | 590    | 20    | 8.19E-97  | 77.30%     |
| F1292     | Acetyl-synthetase                                                | 594    | 20    | 1.16E-99  | 96.00%     |
| F667      | Acetyl-synthetase                                                | 593    | 20    | 6.70E-99  | 95.05%     |
| F530      | Abhydrolase domain                                               | 296    | 20    | 7.87E-36  | 80.50%     |
| F242      | 40s ribosomal protein S17                                        | 524    | 20    | 3.86E-55  | 95.25%     |
| F13       | Uncharacterized protein                                          | 247    | 20    | 1.47E-26  | 89.80%     |
