# Supplementary material for: Identifying Differentially Expressed Genes in Pollen from Self-Incompatible “Wuzishatangju” and Self-Compatible “Shatangju” Mandarins
Source: MDPI journal article supplement (doi:10.3390/ijms14048538), 2013-04-17
Supplement: s1 [file s1 › Table S2.xls]

## Sheet: F library molecular function
Level	GO ID	Term	Type	#Seqs	Graph Score	Sequences
2	GO:0003674	molecular_function	molecular_function	44	12.99	H102, H128, H521, H997, H1174, H1206, H601, H521, H304, H447, H884, H1038, H1166, H1234, H580, H576, H933, H1125, H749, H865, H984, H583, H986, H283, H549, H748, H293, H783, H868, H1128, H545, H1207, H1099, H708, H761, H557, H431, H543, H858, H1191, H931, H572, H428, H597
2	GO:0005198	structural molecule activity	molecular_function	3	1.2	H128, H576, H557
2	GO:0060089	molecular transducer activity	molecular_function	2	1.2	H597, H1174
2	GO:0005215	transporter activity	molecular_function	8	1.04	H115, H576, H865, H984, H447, H545, H1207, H1099
2	GO:0003824	catalytic activity	molecular_function	37	8.41	H115, H264, H521, H997, H1174, H1206, H601, H521, H933, H1125, H749, H549, H748, H293, H783, H868, H1128, H884, H708, H761, H447, H431, H543, H1038, H1234, H858, H283, H1191, H1166, H931, H572, H986, H545, H580, H865, H984, H1099, H1207
2	GO:0005488	binding	molecular_function	23	9.23	H115, H102, H1174, H304, H447, H884, H1038, H1166, H1234, H933, H1125, H576, H601, H583, H986, H283, H580, H572, H858, H931, H749, H428
3	GO:0048037	cofactor binding	molecular_function	2	1.2	H933, H1125
3	GO:0004871	signal transducer activity	molecular_function	2	2	H597, H1174
3	GO:0030246	carbohydrate binding	molecular_function	2	2	H601, H931
3	GO:0005515	protein binding	molecular_function	11	6.28	H115, H1174, H304, H447, H884, H1038, H1166, H1234, H283, H428
3	GO:0000166	nucleotide binding	molecular_function	9	2.78	H601, H1174, H283, H1038, H1234, H304, H858, H931
3	GO:0016874	ligase activity	molecular_function	2	0.36	H556, H858
3	GO:0016740	transferase activity	molecular_function	6	0.85	H1174, H264, H601, H521, H431, H931
3	GO:0022857	transmembrane transporter activity	molecular_function	8	1.73	H115, H576, H865, H984, H447, H545, H1207, H1099
3	GO:0016491	oxidoreductase activity	molecular_function	6	1.3	H545, H580, H865, H984, H1099, H1207
3	GO:0016787	hydrolase activity	molecular_function	14	4.9	H115, H997, H1206, H749, H549, H748, H884, H543, H1038, H1234, H283, H572, H447, H986
3	GO:0016853	isomerase activity	molecular_function	4	0.86	H933, H1125, H601, H931
3	GO:0043167	ion binding	molecular_function	7	1.09	H115, H576, H1166, H447, H583, H986, H572
3	GO:0003676	nucleic acid binding	molecular_function	2	0.36	H102, H580
3	GO:0022892	substrate-specific transporter activity	molecular_function	7	1.65	H115, H865, H984, H447, H545, H1207, H1099
3	GO:0003735	structural constituent of ribosome	molecular_function	1	1	H557
3	GO:0003700	sequence-specific DNA binding transcription factor activity	molecular_function	2	1	H102, H580
3	GO:0016829	lyase activity	molecular_function	9	4.08	H115, H293, H783, H868, H1128, H708, H761, H447, H1166
3	GO:0005200	structural constituent of cytoskeleton	molecular_function	1	1	H576
4	GO:0016772	transferase activity, transferring phosphorus-containing groups	molecular_function	3	0.79	H1174, H601, H931
4	GO:0016835	carbon-oxygen lyase activity	molecular_function	4	1.44	H293, H783, H868, H1128
4	GO:0022803	passive transmembrane transporter activity	molecular_function	2	0.08	H115, H447
4	GO:0016820	hydrolase activity, acting on acid anhydrides, catalyzing transmembrane movement of substances	molecular_function	2	0.13	H115, H447
4	GO:0016854	racemase and epimerase activity	molecular_function	4	1.44	H933, H1125, H601, H931
4	GO:0016627	oxidoreductase activity, acting on the CH-CH group of donors	molecular_function	6	2.16	H545, H580, H865, H984, H1099, H1207
4	GO:0016798	hydrolase activity, acting on glycosyl bonds	molecular_function	5	2.63	H997, H749, H549, H748, H884
4	GO:0046983	protein dimerization activity	molecular_function	1	0.6	H283
4	GO:0016817	hydrolase activity, acting on acid anhydrides	molecular_function	4	0.42	H115, H283, H572, H447
4	GO:0008092	cytoskeletal protein binding	molecular_function	1	0.6	H428
4	GO:0016830	carbon-carbon lyase activity	molecular_function	1	0.36	H1166
4	GO:0016757	transferase activity, transferring glycosyl groups	molecular_function	3	0.62	H264, H521, H431
4	GO:0050662	coenzyme binding	molecular_function	2	2	H933, H1125
4	GO:0042802	identical protein binding	molecular_function	1	0.6	H283
4	GO:0043169	cation binding	molecular_function	7	1.82	H115, H576, H1166, H447, H583, H986, H572
4	GO:0022804	active transmembrane transporter activity	molecular_function	6	0.41	H115, H576, H545, H1099, H1207, H447
4	GO:0016879	ligase activity, forming carbon-nitrogen bonds	molecular_function	2	0.6	H556, H858
4	GO:0003677	DNA binding	molecular_function	1	0.6	H580
4	GO:0051082	unfolded protein binding	molecular_function	2	1	H304
4	GO:0032553	ribonucleotide binding	molecular_function	7	1.3	H283, H1038, H1234, H304, H858, H931
4	GO:0022891	substrate-specific transmembrane transporter activity	molecular_function	7	2.75	H115, H865, H984, H447, H545, H1207, H1099
4	GO:0008233	peptidase activity	molecular_function	1	0.22	H986
4	GO:0016788	hydrolase activity, acting on ester bonds	molecular_function	2	1.56	H1206, H543
4	GO:0019899	enzyme binding	molecular_function	1	0.6	H1174
4	GO:0005516	calmodulin binding	molecular_function	1	1	H447
4	GO:0017076	purine nucleotide binding	molecular_function	7	1.3	H283, H1038, H1234, H304, H858, H931
5	GO:0070011	peptidase activity, acting on L-amino acid peptides	molecular_function	1	0.36	H986
5	GO:0016298	lipase activity	molecular_function	1	1	H543
5	GO:0016301	kinase activity	molecular_function	4	1.32	H304, H1174, H601, H931
5	GO:0045330	aspartyl esterase activity	molecular_function	1	1	H1206
5	GO:0015399	primary active transmembrane transporter activity	molecular_function	2	0.08	H447, H1092
5	GO:0051020	GTPase binding	molecular_function	1	1	H1174
5	GO:0016818	hydrolase activity, acting on acid anhydrides, in phosphorus-containing anhydrides	molecular_function	3	0.59	H283, H572, H447
5	GO:0016758	transferase activity, transferring hexosyl groups	molecular_function	3	1.03	H264, H521, H431
5	GO:0016773	phosphotransferase activity, alcohol group as acceptor	molecular_function	3	1.32	H1174, H601, H931
5	GO:0030554	adenyl nucleotide binding	molecular_function	4	1.08	H304, H858, H931
5	GO:0008194	UDP-glycosyltransferase activity	molecular_function	2	1.32	H521, H431
5	GO:0004553	hydrolase activity, hydrolyzing O-glycosyl compounds	molecular_function	4	2.72	H997, H749, H549, H748
5	GO:0022838	substrate-specific channel activity	molecular_function	1	0.22	H447
5	GO:0016857	racemase and epimerase activity, acting on carbohydrates and derivatives	molecular_function	4	2.4	H933, H1125, H601, H931
5	GO:0032555	purine ribonucleotide binding	molecular_function	7	2.16	H283, H1038, H1234, H304, H858, H931
5	GO:0003779	actin binding	molecular_function	1	1	H428
5	GO:0046872	metal ion binding	molecular_function	6	3.04	H576, H1166, H447, H583, H986, H572
5	GO:0016832	aldehyde-lyase activity	molecular_function	1	0.6	H1166
5	GO:0015144	carbohydrate transmembrane transporter activity	molecular_function	4	0.91	H545, H1207, H1092, H1099
5	GO:0015291	secondary active transmembrane transporter activity	molecular_function	5	0.6	H576, H545, H1099, H1092, H1207
5	GO:0043565	sequence-specific DNA binding	molecular_function	1	1	H580
5	GO:0016881	acid-amino acid ligase activity	molecular_function	2	1	H556, H858
5	GO:0015075	ion transmembrane transporter activity	molecular_function	5	0.73	H447, H545, H1092, H1099, H1207
5	GO:0015267	channel activity	molecular_function	1	0.13	H447
5	GO:0042626	ATPase activity, coupled to transmembrane movement of substances	molecular_function	1	0.22	H447
5	GO:0042803	protein homodimerization activity	molecular_function	1	1	H283
5	GO:0016837	carbon-oxygen lyase activity, acting on polysaccharides	molecular_function	4	2.4	H293, H783, H868, H1128
5	GO:0016628	oxidoreductase activity, acting on the CH-CH group of donors, NAD or NADP as acceptor	molecular_function	6	3.6	H545, H580, H865, H984, H1099, H1207
5	GO:0019001	guanyl nucleotide binding	molecular_function	3	1.08	H283, H1038, H1234
6	GO:0015297	antiporter activity	molecular_function	1	0.36	H576
6	GO:0016462	pyrophosphatase activity	molecular_function	3	0.98	H283, H572, H447
6	GO:0047262	polygalacturonate 4-alpha-galacturonosyltransferase activity	molecular_function	1	1	H431
6	GO:0004175	endopeptidase activity	molecular_function	1	0.6	H986
6	GO:0015925	galactosidase activity	molecular_function	1	0.6	H749
6	GO:0032561	guanyl ribonucleotide binding	molecular_function	3	1.8	H283, H1038, H1234
6	GO:0046914	transition metal ion binding	molecular_function	4	2.4	H576, H1166, H583, H986
6	GO:0035251	UDP-glucosyltransferase activity	molecular_function	1	1.2	H521
6	GO:0004034	aldose 1-epimerase activity	molecular_function	2	2	H601, H931
6	GO:0030570	pectate lyase activity	molecular_function	4	4	H293, H783, H868, H1128
6	GO:0047918	GDP-mannose 3,5-epimerase activity	molecular_function	2	2	H933, H1125
6	GO:0015293	symporter activity	molecular_function	3	0.65	H545, H1099, H1207
6	GO:0004672	protein kinase activity	molecular_function	4	2.2	H1174, H304, H601, H931
6	GO:0046527	glucosyltransferase activity	molecular_function	1	0.72	H521
6	GO:0015405	P-P-bond-hydrolysis-driven transmembrane transporter activity	molecular_function	1	0.13	H447
6	GO:0032559	adenyl ribonucleotide binding	molecular_function	3	1.8	H304, H858, H931
6	GO:0005216	ion channel activity	molecular_function	1	0.36	H447
6	GO:0032440	2-alkenal reductase activity	molecular_function	6	6	H545, H580, H865, H984, H1099, H1207
6	GO:0042625	ATPase activity, coupled to transmembrane movement of ions	molecular_function	1	0.36	H447
6	GO:0030599	pectinesterase activity	molecular_function	1	1	H1206
6	GO:0000287	magnesium ion binding	molecular_function	1	1	H572
6	GO:0008237	metallopeptidase activity	molecular_function	1	0.6	H986
6	GO:0015926	glucosidase activity	molecular_function	1	0.6	H997
6	GO:0004332	fructose-bisphosphate aldolase activity	molecular_function	1	1	H1166
6	GO:0051119	sugar transmembrane transporter activity	molecular_function	3	1.51	H545, H1207, H1099
6	GO:0008324	cation transmembrane transporter activity	molecular_function	5	1.22	H447, H545, H1092, H1099, H1207
7	GO:0016759	cellulose synthase activity	molecular_function	1	0.6	H521
7	GO:0008270	zinc ion binding	molecular_function	2	2	H583, H986
7	GO:0017111	nucleoside-triphosphatase activity	molecular_function	2	0.63	H283, H447
7	GO:0008422	beta-glucosidase activity	molecular_function	1	1	H997
7	GO:0019829	cation-transporting ATPase activity	molecular_function	1	0.6	H447
7	GO:0004713	protein tyrosine kinase activity	molecular_function	2	1	H304, H931
7	GO:0046873	metal ion transmembrane transporter activity	molecular_function	1	0.36	H447
7	GO:0005525	GTP binding	molecular_function	3	3	H283, H1038, H1234
7	GO:0022890	inorganic cation transmembrane transporter activity	molecular_function	1	0.22	H447
7	GO:0005261	cation channel activity	molecular_function	1	0.6	H447
7	GO:0004565	beta-galactosidase activity	molecular_function	1	1	H749
7	GO:0004222	metalloendopeptidase activity	molecular_function	1	1	H986
7	GO:0004674	protein serine/threonine kinase activity	molecular_function	2	1	H1174, H304
7	GO:0004427	inorganic diphosphatase activity	molecular_function	1	1	H572
7	GO:0005351	sugar:hydrogen symporter activity	molecular_function	3	3	H545, H1099, H1207
7	GO:0016760	cellulose synthase (UDP-forming) activity	molecular_function	1	1	H521
7	GO:0015145	monosaccharide transmembrane transporter activity	molecular_function	2	0.72	H545, H1207
7	GO:0015294	solute:cation symporter activity	molecular_function	3	1.08	H545, H1099, H1207
7	GO:0005507	copper ion binding	molecular_function	2	2	H576, H1166
7	GO:0015300	solute:solute antiporter activity	molecular_function	1	0.6	H576
7	GO:0005524	ATP binding	molecular_function	3	3	H304, H858, H931
7	GO:0015662	ATPase activity, coupled to transmembrane movement of ions, phosphorylative mechanism	molecular_function	1	0.6	H447
7	GO:0008466	glycogenin glucosyltransferase activity	molecular_function	1	1	H521
8	GO:0005262	calcium channel activity	molecular_function	1	1	H447
8	GO:0015149	hexose transmembrane transporter activity	molecular_function	2	1.2	H545, H1207
8	GO:0005471	ATP:ADP antiporter activity	molecular_function	1	1	H576
8	GO:0005388	calcium-transporting ATPase activity	molecular_function	1	1	H447
8	GO:0016887	ATPase activity	molecular_function	1	0.05	H447
8	GO:0005402	cation:sugar symporter activity	molecular_function	3	1.8	H545, H1099, H1207
8	GO:0015295	solute:hydrogen symporter activity	molecular_function	3	1.8	H545, H1099, H1207
8	GO:0003924	GTPase activity	molecular_function	1	1	H283
8	GO:0015085	calcium ion transmembrane transporter activity	molecular_function	2	0.6	H447,H1092
9	GO:0005354	galactose transmembrane transporter activity	molecular_function	2	2	H545, H1207
9	GO:0042623	ATPase activity, coupled	molecular_function	1	0.08	H447
10	GO:0043492	ATPase activity, coupled to movement of substances	molecular_function	1	0.13	H447

## Sheet: R library molecular function
Level	GO ID	Term	Type	#Seqs	Graph Score	Sequences
2	GO:0003674	molecular_function	molecular_function	84	19.4	F15, F78, F250, F685, F1001, F546, F499, F466, F437, F341, F339, F338, F185, F317, F965, F392, F365, F580, F327, F800, F647, F573, F354, F304, F303, F277, F197, F905, F477, F1197, F1029, F637, F785, F666, F465, F966, F13, F396, F1110, F1166, F374, F302, F1002, F1056, F611, F896, F731, F63
2	GO:0005198	structural molecule activity	molecular_function	2	1.2	F965, F242
2	GO:0060089	molecular transducer activity	molecular_function	4	1.32	F374, F685, F302, F1002
2	GO:0009055	electron carrier activity	molecular_function	1	0.6	F1001
2	GO:0005215	transporter activity	molecular_function	25	2.54	F1001,F822, F317, F392, F647, F573, F354, F304, F303, F277, F197, F905, F477, F1197, F1029, F896, F731, F965, F960, F815, F225, F170, F120, F1271, F637
2	GO:0003824	catalytic activity	molecular_function	67	12.66	F15,F822, F78, F250, F466,F499, F546, F437, F341, F339, F338, F185, F1001, F365, F327, F800, F785, F666, F465, F905, F647, F573, F477, F392, F354, F304, F303, F277, F197, F1197, F1029, F1056, F1002, F611, F636, F938, F396, F1110, F503, F667, F1292, F65, F475, F1032, F1169, F446, F830, F
2	GO:0005488	binding	molecular_function	35	13.9	F637, F580, F966, F499, F13, F396, F1110, F1166, F391, F843, F719, F519, F1127, F1445, F815, F327, F225, F170, F120, F462, F1015, F965, F503, F418, F331, F1002, F785, F666, F465, F667, F1292, F65, F475, F1032
3	GO:0004871	signal transducer activity	molecular_function	4	2.2	F374, F685, F302, F1002
3	GO:0005515	protein binding	molecular_function	11	7.76	F966, F499, F13, F815, F327, F225, F170, F120, F462, F391, F1002
3	GO:0000166	nucleotide binding	molecular_function	13	5.17	F391, F966, F843, F719, F519, F13, F1127, F667, F1292, F65, F475, F1032, F1002
3	GO:0016874	ligase activity	molecular_function	2	0.43	F667, F1292
3	GO:0016740	transferase activity	molecular_function	8	0.76	F1056, F1002, F65, F822, F475, F1032, F446
3	GO:0022857	transmembrane transporter activity	molecular_function	23	3.87	F1001, F317, F392, F647, F573, F354, F304, F303, F277, F197, F905, F477, F1197, F1029, F896, F731, F965, F815, F225, F170, F120, F1271, F637
3	GO:0016491	oxidoreductase activity	molecular_function	17	3.96	F1001, F905, F647, F573, F477, F392, F354, F304, F303, F277, F197, F1197, F1029, F611, F396, F1110, F503
3	GO:0045153	electron transporter, transferring electrons within CoQH2-cytochrome c reductase complex activity	molecular_function	1	1	F1001
3	GO:0016787	hydrolase activity	molecular_function	31	9.65	F365, F250, F327, F800, F685, F785, F666, F465, F636, F938, F1169, F830, F471, F1415, F947, F937, F553, F1019, F637, F530, F391, F374, F302, F1445, F815, F225, F170, F120, F786, F481, F1015, F446
3	GO:0043167	ion binding	molecular_function	16	4.37	F637, F580, F396, F1110, F1015, F1166, F965, F503, F966, F815, F418, F331, F225, F170, F13, F120
3	GO:0003676	nucleic acid binding	molecular_function	4	2.8	F785, F666, F465, F580
3	GO:0022892	substrate-specific transporter activity	molecular_function	22	3.55	F1001, F317, F392, F647, F573, F354, F304, F303, F277, F197, F905, F477, F1197, F1029, F896, F731, F960, F815, F225, F170, F120, F1271
3	GO:0046906	tetrapyrrole binding	molecular_function	2	1.2	F396, F1110
3	GO:0008289	lipid binding	molecular_function	1	0.36	F1166
3	GO:0003735	structural constituent of ribosome	molecular_function	1	1	F242
3	GO:0003700	sequence-specific DNA binding transcription factor activity	molecular_function	1	1	F580
3	GO:0016829	lyase activity	molecular_function	11	6.3	F466, F437, F341, F339, F338, F185, F815, F225, F170, F120, F1030
3	GO:0005200	structural constituent of cytoskeleton	molecular_function	1	1	F965
4	GO:0016679	oxidoreductase activity, acting on diphenols and related substances as donors	molecular_function	2	0.72	F1001, F503
4	GO:0016772	transferase activity, transferring phosphorus-containing groups	molecular_function	6	1.27	F1056, F1002, F65, F475, F1032, F446
4	GO:0016835	carbon-oxygen lyase activity	molecular_function	6	2.16	F466, F437, F341, F339, F338, F185
4	GO:0015197	peptide transporter activity	molecular_function	1	0.6	F960
4	GO:0022803	passive transmembrane transporter activity	molecular_function	6	0.74	F896, F731, F815, F225, F170, F120
4	GO:0020037	heme binding	molecular_function	2	2	F396, F1110
4	GO:0016820	hydrolase activity, acting on acid anhydrides, catalyzing transmembrane movement of substances	molecular_function	5	1.52	F637, F815, F225, F170, F120
4	GO:0005543	phospholipid binding	molecular_function	1	0.6	F1166
4	GO:0016627	oxidoreductase activity, acting on the CH-CH group of donors	molecular_function	12	4.32	F905, F647, F573, F477, F392, F354, F304, F303, F277, F197, F1197, F1029
4	GO:0016798	hydrolase activity, acting on glycosyl bonds	molecular_function	12	4.96	F365, F250, F830, F1415, F947, F937, F553, F1019, F1445, F786, F481, F1015
4	GO:0016817	hydrolase activity, acting on acid anhydrides	molecular_function	5	0.91	F637, F815, F225, F170, F120
4	GO:0031072	heat shock protein binding	molecular_function	2	2	F966, F13
4	GO:0016705	oxidoreductase activity, acting on paired donors, with incorporation or reduction of molecular oxygen	molecular_function	3	1.56	F611, F396, F1110
4	GO:0043169	cation binding	molecular_function	16	7.28	F637, F580, F396, F1110, F1015, F1166, F965, F503, F966, F815, F418, F331, F225, F170, F13, F120
4	GO:0022804	active transmembrane transporter activity	molecular_function	17	1.53	F905, F647, F573, F477, F354, F304, F303, F277, F197, F1197, F1029, F965, F1271, F815, F225, F170, F120
4	GO:0051082	unfolded protein binding	molecular_function	2	2	F966, F13
4	GO:0003723	RNA binding	molecular_function	3	3	F785, F666, F465
4	GO:0032553	ribonucleotide binding	molecular_function	9	1.94	F391, F966, F843, F719, F519, F13, F1127, F667, F1292
4	GO:0022891	substrate-specific transmembrane transporter activity	molecular_function	21	5.31	F1001, F317, F392, F647, F573, F354, F304, F303, F277, F197, F905, F477, F1197, F1029, F896, F731, F815, F225, F170, F120, F1271
4	GO:0008233	peptidase activity	molecular_function	2	0.58	F1169, F471
4	GO:0004872	receptor activity	molecular_function	3	2	F374, F685, F302
4	GO:0016788	hydrolase activity, acting on ester bonds	molecular_function	8	2.73	F327, F800, F785, F666, F465, F636, F938, F446
4	GO:0016877	ligase activity, forming carbon-sulfur bonds	molecular_function	2	0.72	F667, F1292
4	GO:0017171	serine hydrolase activity	molecular_function	1	0.6	F1169
4	GO:0019899	enzyme binding	molecular_function	1	0.6	F1002
4	GO:0005516	calmodulin binding	molecular_function	6	5	F15, F815, F327, F225, F170, F120
4	GO:0017076	purine nucleotide binding	molecular_function	9	1.94	F391, F966, F843, F719, F519, F13, F1127, F667, F1292
5	GO:0070011	peptidase activity, acting on L-amino acid peptides	molecular_function	2	0.96	F1169, F471
5	GO:0016298	lipase activity	molecular_function	1	0.6	F636
5	GO:0016878	acid-thiol ligase activity	molecular_function	2	1.2	F667, F1292
5	GO:0016301	kinase activity	molecular_function	6	2.11	F1056, F1002, F65, F475, F1032, F446
5	GO:0008236	serine-type peptidase activity	molecular_function	1	1	F1169
5	GO:0045330	aspartyl esterase activity	molecular_function	1	1	F800
5	GO:0015198	oligopeptide transporter activity	molecular_function	1	1	F960
5	GO:0015399	primary active transmembrane transporter activity	molecular_function	4	0.31	F815, F225, F170, F120
5	GO:0051020	GTPase binding	molecular_function	2	1	F1002, F78
5	GO:0042578	phosphoric ester hydrolase activity	molecular_function	4	1.37	F15, F327, F938, F446
5	GO:0016818	hydrolase activity, acting on acid anhydrides, in phosphorus-containing anhydrides	molecular_function	4	0.04	F815, F225, F170, F120
5	GO:0016682	oxidoreductase activity, acting on diphenols and related substances as donors, oxygen as acceptor	molecular_function	1	0.6	F503
5	GO:0005372	water transmembrane transporter activity	molecular_function	2	1.2	F896, F731
5	GO:0016405	CoA-ligase activity	molecular_function	2	1.2	F667, F1292
5	GO:0016773	phosphotransferase activity, alcohol group as acceptor	molecular_function	5	1.11	F1056, F1002, F65, F475, F1032
5	GO:0016706	oxidoreductase activity, acting on paired donors, with incorporation or reduction of molecular oxygen, 2-oxoglutarate as one donor, and incorporation of one atom each of oxygen into both donors	molecular_function	1	0.6	F611
5	GO:0030554	adenyl nucleotide binding	molecular_function	8	2.88	F966, F843, F719, F519, F13, F1127, F667, F1292
5	GO:0004553	hydrolase activity, hydrolyzing O-glycosyl compounds	molecular_function	11	6.6	F365, F250, F830, F947, F937, F553, F1019, F1445, F786, F481, F1015
5	GO:0022838	substrate-specific channel activity	molecular_function	6	2.06	F896, F731, F815, F225, F170, F120
5	GO:0032555	purine ribonucleotide binding	molecular_function	9	3.24	F391, F966, F843, F719, F519, F13, F1127, F667, F1292
5	GO:0046872	metal ion binding	molecular_function	15	10.47	F637, F580, F396, F1110, F1166, F965, F503, F966, F815, F418, F331, F225, F170, F13, F120
5	GO:0015144	carbohydrate transmembrane transporter activity	molecular_function	11	3.28	F647, F573, F354, F304, F303, F277, F197, F905, F477, F1197, F1029
5	GO:0015291	secondary active transmembrane transporter activity	molecular_function	12	1.64	F905, F647, F573, F477, F354, F304, F303, F277, F197, F1197, F1029, F965
5	GO:0005544	calcium-dependent phospholipid binding	molecular_function	1	1	F1166
5	GO:0015075	ion transmembrane transporter activity	molecular_function	19	3.53	F1001, F317, F905, F647, F573, F477, F354, F304, F303, F277, F197, F1197, F1029, F896, F731, F815, F225, F170, F120
5	GO:0005342	organic acid transmembrane transporter activity	molecular_function	1	0.36	F1271
5	GO:0016681	oxidoreductase activity, acting on diphenols and related substances as donors, cytochrome as acceptor	molecular_function	1	0.6	F1001
5	GO:0016717	oxidoreductase activity, acting on paired donors, with oxidation of a pair of donors resulting in the reduction of molecular oxygen to two molecules of water	molecular_function	2	2	F396, F1110
5	GO:0015267	channel activity	molecular_function	6	1.24	F896, F731, F815, F225, F170, F120
5	GO:0042626	ATPase activity, coupled to transmembrane movement of substances	molecular_function	4	0.86	F815, F225, F170, F120
5	GO:0005275	amine transmembrane transporter activity	molecular_function	1	0.6	F1271
5	GO:0004518	nuclease activity	molecular_function	3	0.39	F785, F666, F465
5	GO:0016837	carbon-oxygen lyase activity, acting on polysaccharides	molecular_function	6	3.6	F466, F437, F341, F339, F338, F185
5	GO:0004091	carboxylesterase activity	molecular_function	1	1	F800
5	GO:0016628	oxidoreductase activity, acting on the CH-CH group of donors, NAD or NADP as acceptor	molecular_function	12	7.2	F905, F647, F573, F477, F392, F354, F304, F303, F277, F197, F1197, F1029
5	GO:0019001	guanyl nucleotide binding	molecular_function	1	0.36	F391
6	GO:0015297	antiporter activity	molecular_function	1	0.36	F965
6	GO:0016462	pyrophosphatase activity	molecular_function	4	0.07	F815, F225, F170, F120
6	GO:0004175	endopeptidase activity	molecular_function	1	0.6	F471
6	GO:0015925	galactosidase activity	molecular_function	1	0.6	F1445
6	GO:0032561	guanyl ribonucleotide binding	molecular_function	1	0.6	F391
6	GO:0046914	transition metal ion binding	molecular_function	6	3.12	F637, F580, F396, F1110, F965, F503
6	GO:0004540	ribonuclease activity	molecular_function	3	0.65	F785, F666, F465
6	GO:0003987	acetate-CoA ligase activity	molecular_function	2	2	F667, F1292
6	GO:0004564	beta-fructofuranosidase activity	molecular_function	4	2.4	F947, F937, F553, F1019
6	GO:0033949	fructan beta-(2,6)-fructosidase activity	molecular_function	3	3	F947, F937, F553
6	GO:0030570	pectate lyase activity	molecular_function	6	6	F466, F437, F341, F339, F338, F185
6	GO:0015293	symporter activity	molecular_function	11	2.38	F905, F647, F573, F477, F354, F304, F303, F277, F197, F1197, F1029
6	GO:0004672	protein kinase activity	molecular_function	5	1.85	F1056, F1002, F65, F475, F1032
6	GO:0016791	phosphatase activity	molecular_function	3	1.68	F15, F327, F938
6	GO:0005509	calcium ion binding	molecular_function	1	1	F1166
6	GO:0015250	water channel activity	molecular_function	2	2	F896, F731
6	GO:0045486	naringenin 3-dioxygenase activity	molecular_function	1	1	F611
6	GO:0047372	acylglycerol lipase activity	molecular_function	1	1	F636
6	GO:0008509	anion transmembrane transporter activity	molecular_function	2	0.72	F896, F731
6	GO:0015405	P-P-bond-hydrolysis-driven transmembrane transporter activity	molecular_function	4	0.52	F815, F225, F170, F120
6	GO:0008234	cysteine-type peptidase activity	molecular_function	1	0.6	F471
6	GO:0032559	adenyl ribonucleotide binding	molecular_function	8	4.8	F966, F843, F719, F519, F13, F1127, F667, F1292
6	GO:0005216	ion channel activity	molecular_function	4	1.44	F815, F225, F170, F120
6	GO:0042625	ATPase activity, coupled to transmembrane movement of ions	molecular_function	4	1.44	F815, F225, F170, F120
6	GO:0032440	2-alkenal reductase activity	molecular_function	12	12	F905, F647, F573, F477, F392, F354, F304, F303, F277, F197, F1197, F1029
6	GO:0030599	pectinesterase activity	molecular_function	1	1	F800
6	GO:0046943	carboxylic acid transmembrane transporter activity	molecular_function	1	0.6	F1271
6	GO:0015171	amino acid transmembrane transporter activity	molecular_function	1	1	F1271
6	GO:0015926	glucosidase activity	molecular_function	7	2.4	F250, F365, F830, F947, F937, F553, F1019
6	GO:0004519	endonuclease activity	molecular_function	3	0.65	F785, F666, F465
6	GO:0008081	phosphoric diester hydrolase activity	molecular_function	1	0.6	F446
6	GO:0008121	ubiquinol-cytochrome-c reductase activity	molecular_function	1	1	F1001
6	GO:0008447	L-ascorbate oxidase activity	molecular_function	1	1	F503
6	GO:0051119	sugar transmembrane transporter activity	molecular_function	11	5.47	F647, F573, F354, F304, F303, F277, F197, F905, F477, F1197, F1029
6	GO:0008324	cation transmembrane transporter activity	molecular_function	17	5.17	F1001, F317, F905, F647, F573, F477, F354, F304, F303, F277, F197, F1197, F1029, F815, F225, F170, F120
7	GO:0004197	cysteine-type endopeptidase activity	molecular_function	1	1	F471
7	GO:0004721	phosphoprotein phosphatase activity	molecular_function	2	1.8	F15, F327
7	GO:0008270	zinc ion binding	molecular_function	2	2	F637, F580
7	GO:0017111	nucleoside-triphosphatase activity	molecular_function	4	0.11	F815, F225, F170, F120
7	GO:0008422	beta-glucosidase activity	molecular_function	2	1.6	F365, F830
7	GO:0019829	cation-transporting ATPase activity	molecular_function	4	2.4	F815, F225, F170, F120
7	GO:0016208	AMP binding	molecular_function	2	2	F667, F1292
7	GO:0004521	endoribonuclease activity	molecular_function	3	1.08	F785, F666, F465
7	GO:0008889	glycerophosphodiester phosphodiesterase activity	molecular_function	1	1	F446
7	GO:0016893	endonuclease activity, active with either ribo- or deoxyribonucleic acids and producing 5'-phosphomonoesters	molecular_function	3	1.08	F785, F666, F465
7	GO:0015103	inorganic anion transmembrane transporter activity	molecular_function	2	1.2	F896, F731
7	GO:0046873	metal ion transmembrane transporter activity	molecular_function	5	2.04	F317, F815, F225, F170, F120
7	GO:0005525	GTP binding	molecular_function	1	1	F391
7	GO:0022890	inorganic cation transmembrane transporter activity	molecular_function	6	1.44	F1001, F317, F815, F225, F170, F120
7	GO:0005261	cation channel activity	molecular_function	4	2.4	F815, F225, F170, F120
7	GO:0004565	beta-galactosidase activity	molecular_function	1	1	F1445
7	GO:0004674	protein serine/threonine kinase activity	molecular_function	8	3.08	F1056, F1002, F65, F78, F822, F475, F1032
7	GO:0005506	iron ion binding	molecular_function	2	1.2	F396, F1110
7	GO:0005351	sugar:hydrogen symporter activity	molecular_function	11	11	F905, F647, F573, F477, F354, F304, F303, F277, F197, F1197, F1029
7	GO:0004558	alpha-glucosidase activity	molecular_function	4	2.4	F947, F937, F553, F1019
7	GO:0015145	monosaccharide transmembrane transporter activity	molecular_function	7	2.52	F647, F573, F354, F304, F303, F277, F197
7	GO:0015294	solute:cation symporter activity	molecular_function	11	3.96	F905, F647, F573, F477, F354, F304, F303, F277, F197, F1197, F1029
7	GO:0005507	copper ion binding	molecular_function	2	2	F965, F503
7	GO:0015300	solute:solute antiporter activity	molecular_function	1	0.6	F965
7	GO:0003993	acid phosphatase activity	molecular_function	1	1	F938
7	GO:0015662	ATPase activity, coupled to transmembrane movement of ions, phosphorylative mechanism	molecular_function	4	2.4	F815, F225, F170, F120
7	GO:0005524	ATP binding	molecular_function	6	6	F966, F843, F719, F519, F13, F1127
8	GO:0004338	glucan exo-1,3-beta-glucosidase activity	molecular_function	1	1	F365
8	GO:0008138	protein tyrosine/serine/threonine phosphatase activity	molecular_function	2	1	F15, F327
8	GO:0005262	calcium channel activity	molecular_function	4	4	F815, F225, F170, F120
8	GO:0004683	calmodulin-dependent protein kinase activity	molecular_function	3	1.8	F65, F475, F1032
8	GO:0033549	MAP kinase phosphatase activity	molecular_function	2	1	F15, F327
8	GO:0004575	sucrose alpha-glucosidase activity	molecular_function	4	4	F947, F937, F553, F1019
8	GO:0004725	protein tyrosine phosphatase activity	molecular_function	2	1	F15, F327
8	GO:0016891	endoribonuclease activity, producing 5'-phosphomonoesters	molecular_function	3	1.8	F785, F666, F465
8	GO:0015149	hexose transmembrane transporter activity	molecular_function	7	4.2	F647, F573, F354, F304, F303, F277, F197
8	GO:0015095	magnesium ion transmembrane transporter activity	molecular_function	1	1	F317
8	GO:0005471	ATP:ADP antiporter activity	molecular_function	1	1	F965
8	GO:0015105	arsenite transmembrane transporter activity	molecular_function	2	2	F896, F731
8	GO:0005388	calcium-transporting ATPase activity	molecular_function	4	4	F815, F225, F170, F120
8	GO:0015077	monovalent inorganic cation transmembrane transporter activity	molecular_function	1	0.36	F1001
8	GO:0016887	ATPase activity	molecular_function	4	0.19	F815, F225, F170, F120
8	GO:0005402	cation:sugar symporter activity	molecular_function	11	6.6	F905, F647, F573, F477, F354, F304, F303, F277, F197, F1197, F1029
8	GO:0015295	solute:hydrogen symporter activity	molecular_function	11	6.6	F905, F647, F573, F477, F354, F304, F303, F277, F197, F1197, F1029
8	GO:0015085	calcium ion transmembrane transporter activity	molecular_function	4	2.4	F815, F225, F170, F120
9	GO:0015078	hydrogen ion transmembrane transporter activity	molecular_function	1	0.6	F1001
9	GO:0005354	galactose transmembrane transporter activity	molecular_function	7	7	F647, F573, F354, F304, F303, F277, F197
9	GO:0004523	ribonuclease H activity	molecular_function	3	3	F785, F666, F465
9	GO:0042623	ATPase activity, coupled	molecular_function	4	0.31	F815, F225, F170, F120
9	GO:0016905	myosin heavy chain kinase activity	molecular_function	5	3	F65, F822, F475, F1032
10	GO:0043492	ATPase activity, coupled to movement of substances	molecular_function	4	0.52	F815, F225, F170, F120

## Sheet: F library cellular component
Level	GO ID	Term	Type	#Seqs	Graph Score	Sequences
5	GO:0005626	insoluble fraction	cellular_component	2	1.2	H1038, H1234
5	GO:0043229	intracellular organelle	cellular_component	33	13.31	H521, H304, H556, H128, H576, H102, H986, H1038, H1166, H1234, H447, H283, H1191, H557, H549, H431, H572, H580, H1174, H684, H293, H304, H545, H708, H761, H783, H865, H868, H931, H984, H1037, H1128, H1207
5	GO:0031224	intrinsic to membrane	cellular_component	8	4.8	H1037, H545, H576, H583, H865, H984, H1099, H1207
6	GO:0005829	cytosol	cellular_component	5	4.36	H521, H1038, H1166, H1174, H1234
5	GO:0045275	respiratory chain complex III	cellular_component	1	0.6	H986
4	GO:0031988	membrane-bounded vesicle	cellular_component	15	9	H293, H304, H545, H549, H708, H761, H783, H865, H868, H931, H984, H1037, H1128, H1207, H447
6	GO:0030054	cell junction	cellular_component	1	1	H521
5	GO:0005618	cell wall	cellular_component	7	6.2	H521, H576, H748, H986, H1166, H597, H1206
2	GO:0032991	macromolecular complex	cellular_component	5	0.92	H986, H128, H521, H1191, H557
6	GO:0005840	ribosome	cellular_component	2	1.6	H521, H557
6	GO:0043231	intracellular membrane-bounded organelle	cellular_component	29	18.43	H521, H115, H304, H556, H576, H986, H1038, H1166, H1234, H447, H283, H1191, H549, H431, H572, H580, H1174, H684, H293, H304, H545, H708, H761, H783, H865, H868, H931, H984, H1037, H1128, H1207
3	GO:0043234	protein complex	cellular_component	2	0.58	H986, H1191
4	GO:0030312	external encapsulating structure	cellular_component	7	3.72	H521, H576, H748, H986, H1166, H597, H1206
7	GO:0005746	mitochondrial respiratory chain	cellular_component	2	1.2	H986, H1191
5	GO:0030964	NADH dehydrogenase complex	cellular_component	1	0.36	H1191
4	GO:0031967	organelle envelope	cellular_component	6	2.17	H283, H447, H986, H1191, H576, H1166
7	GO:0005856	cytoskeleton	cellular_component	1	1	H576
6	GO:0031966	mitochondrial membrane	cellular_component	3	1.63	H986, H1191, H576
6	GO:0009527	plastid outer membrane	cellular_component	1	0.6	H283
6	GO:0005747	mitochondrial respiratory chain complex I	cellular_component	1	1	H1191
7	GO:0005739	mitochondrion	cellular_component	5	2.29	H986, H1191, H576, H1166, H549
6	GO:0005730	nucleolus	cellular_component	3	3	H576, H986, H1166
6	GO:0016021	integral to membrane	cellular_component	7	7	H545, H576, H583, H865, H984, H1099, H1207
6	GO:0005743	mitochondrial inner membrane	cellular_component	3	1.72	H986, H1191, H576
8	GO:0000138	Golgi trans cisterna	cellular_component	1	1	H521
7	GO:0031981	nuclear lumen	cellular_component	3	1.8	H576, H986, H1166
4	GO:0000139	Golgi membrane	cellular_component	2	2	H1038, H1234
4	GO:0005622	intracellular	cellular_component	33	6.82	H521, H576, H304, H556, 986, H1038, H1166, H1234, H447, H283, H1191, H557, H549, H164, H431, H572, H580, H1174, H684, H428, H293, H304, H545, H708, H761, H783, H865, H868, H931, H984, H1037, H1128, H1207
2	GO:0005623	cell	cellular_component	37	10.3	H521, H115, H576, H748, H986, H1166, H1038, H1234, H447, H283, H1037, H597, H1206, H1191, H884, H557, H549, H164, H431, H572, H580, H1174, H545, H1207, H684, H428, H293, H304, H708, H761, H783, H865, H868, H931, H984, H1128, H583, H1099
7	GO:0009532	plastid stroma	cellular_component	1	0.6	H447
5	GO:0019866	organelle inner membrane	cellular_component	4	1.39	H447, H986, H1191, H576
6	GO:0005750	mitochondrial respiratory chain complex III	cellular_component	1	1	H986
5	GO:0044459	plasma membrane part	cellular_component	1	0.6	H521
6	GO:0044435	plastid part	cellular_component	4	1.75	H447, H283, H576, H572
2	GO:0043226	organelle	cellular_component	30	8.5	H521, H102, H576, H986, H1038, H1166, H1234, H447, H283, H1191, H557, H549, H431, H572, H580, H1174, H684, H293, H304, H545, H708, H761, H783, H865, H868, H931, H984, H1037, H1128, H1207
7	GO:0009536	plastid	cellular_component	7	3.25	H447, H283, H986, H1166, H576, H684, H572
7	GO:0009941	chloroplast envelope	cellular_component	3	1.72	H283, H447, H576
5	GO:0031970	organelle envelope lumen	cellular_component	1	0.6	H986
7	GO:0005795	Golgi stack	cellular_component	1	0.36	H521
4	GO:0031984	organelle subcompartment	cellular_component	1	0.36	H521
2	GO:0031974	membrane-enclosed lumen	cellular_component	3	0.96	H986, H576, H1166
4	GO:0031975	envelope	cellular_component	6	1.3	H283, H447, H986, H1191, H576, H1166
6	GO:0043232	intracellular non-membrane-bounded organelle	cellular_component	5	3.36	H576, H521, H557, H986, H1166
4	GO:0005615	extracellular space	cellular_component	1	1	H543
4	GO:0043233	organelle lumen	cellular_component	3	1.01	H986, H576, H1166
1	GO:0005575	cellular_component	cellular_component	39	11.22	H521, H102, H576, H748, H986, H1166, H543, H1038, H1234, H447, H283, H1037, H597, H1206, H1191, H884, H557, H549, H164, H431, H572, H580, H1174, H545, H1207, H684, H428, H293, H304, H708, H761, H783, H865, H868, H931, H984, H1128, H583, H1099
6	GO:0031410	cytoplasmic vesicle	cellular_component	15	9	H293, H304, H545, H549, H708, H761, H783, H865, H868, H931, H984, H1037, H1128, H1207, H447
6	GO:0005741	mitochondrial outer membrane	cellular_component	1	1	H986
6	GO:0009505	plant-type cell wall	cellular_component	2	2	H597, H1206
6	GO:0009526	plastid envelope	cellular_component	3	1.03	H283, H447, H576
6	GO:0005624	membrane fraction	cellular_component	2	2	H1038, H1234
6	GO:0005774	vacuolar membrane	cellular_component	7	6	H521, H1092, H576, H986, H1038, H1166, H1234
6	GO:0044437	vacuolar part	cellular_component	7	3.6	H521, H576, H986, H1092, H1038, H1166, H1234
3	GO:0031982	vesicle	cellular_component	16	5.4	H293, H304, H1092, H545, H549, H708, H761, H783, H865, H868, H931, H984, H1037, H1128, H1207, H447
6	GO:0031985	Golgi cisterna	cellular_component	1	0.6	H521
6	GO:0005758	mitochondrial intermembrane space	cellular_component	1	1	H986
3	GO:0043228	non-membrane-bounded organelle	cellular_component	5	2.02	H576, H521, H557, H986, H1166
6	GO:0070013	intracellular organelle lumen	cellular_component	3	1.68	H986, H576, H1166
7	GO:0016023	cytoplasmic membrane-bounded vesicle	cellular_component	15	15	H293, H304, H545, H549, H708, H761, H783, H865, H868, H931, H984, H1037, H1128, H1207, H447
7	GO:0071944	cell periphery	cellular_component	13	7.25	H521, H576, H748, H986, H1166, H597, H1206, H283, H545, H1038, H1207, H1234, H447
5	GO:0031968	organelle outer membrane	cellular_component	2	0.96	H283, H986
5	GO:0019867	outer membrane	cellular_component	2	0.58	H283, H986
3	GO:0044422	organelle part	cellular_component	10	4.77	H521, H576, H986, H1038, H1166, H1234, H447, H283, H1191, H572
7	GO:0009706	chloroplast inner membrane	cellular_component	1	1	H447
4	GO:0044446	intracellular organelle part	cellular_component	10	6.52	H521, H576, H986, H1038, H1166, H1234, H447, H283, H1191, H572
3	GO:0043227	membrane-bounded organelle	cellular_component	29	13.03	H521,H102, H576, H986, H1038, H1166, H1234, H447, H283, H1191, H549, H431, H572, H580, H1174, H684, H293, H304, H545, H708, H761, H783, H865, H868, H931, H984, H1037, H1128, H1207
5	GO:0070469	respiratory chain	cellular_component	2	0.72	H986, H1191
4	GO:0044425	membrane part	cellular_component	12	3.67	H1037, H264, H986, H1191, H521, H545, H576, H583, H865, H984, H1099, H1207
5	GO:0044444	cytoplasmic part	cellular_component	29	17.5	H521, H128, H576, H986, H1038, H1166, H1234, H447, H283, H1191, H557, H549, H431, H1174, H684, H293, H304, H545, H708, H761, H783, H865, H868, H931, H984, H1037, H1128, H1207, H572
4	GO:0031090	organelle membrane	cellular_component	9	6.21	H521, H576, H986, H1038, H1166, H1234, H283, H447, H1191
6	GO:0044429	mitochondrial part	cellular_component	4	2.15	H986, H1191, H576, H1166
4	GO:0000267	cell fraction	cellular_component	2	0.72	H1038, H1234
8	GO:0009570	chloroplast stroma	cellular_component	1	1	H447
4	GO:0012505	endomembrane system	cellular_component	7	4.2	H1038, H1234, H304, H556, H431, H1174, H1206
6	GO:0005759	mitochondrial matrix	cellular_component	1	1	H986
5	GO:0030529	ribonucleoprotein complex	cellular_component	2	0.96	H521, H557
6	GO:0044428	nuclear part	cellular_component	3	1.8	H576, H986, H1166
6	GO:0044445	cytosolic part	cellular_component	1	0.6	H521
7	GO:0031969	chloroplast membrane	cellular_component	2	1.2	H283, H447
6	GO:0005740	mitochondrial envelope	cellular_component	4	2.58	H986, H1191, H576, H1166
2	GO:0005576	extracellular region	cellular_component	2	0.96	H543, H1166
6	GO:0044431	Golgi apparatus part	cellular_component	4	1.56	H1038, H264, H1234, H521
7	GO:0009507	chloroplast	cellular_component	6	3.75	H447, H283, H986, H1166, H576, H572
6	GO:0031225	anchored to membrane	cellular_component	1	1	H1037
3	GO:0044464	cell part	cellular_component	39	17.17	H521, H264, H102, H576, H748, H986, H1166, H1038, H1234, H447, H283, H1037, H597, H1206, H1191, H884, H557, H549, H164, H431, H572, H580, H1174, H545, H1207, H684, H428, H293, H304, H708, H761, H783, H865, H868, H931, H984, H1128, H583, H1099
7	GO:0005773	vacuole	cellular_component	6	2.16	H521, H576, H986, H1038, H1166, H1234
7	GO:0009707	chloroplast outer membrane	cellular_component	1	1	H283
5	GO:0005737	cytoplasm	cellular_component	30	11.5	H521, H115, H576, H986, H1038, H1166, H1234, H447, H283, H1191, H557, H549, H164, H431, H1174, H684, H293, H304, H545, H708, H761, H783, H865, H868, H931, H984, H1037, H1128, H1207, H572
4	GO:0044424	intracellular part	cellular_component	33	9.69	H521, H304, H556, H115, H576, H986, H1038, H1166, H1234, H447, H283, H1191, H557, H549, H164, H431, H572, H580, H1174, H684, H293, H304, H545, H708, H761, H783, H865, H868, H931, H984, H1037, H1128, H1207
6	GO:0042170	plastid membrane	cellular_component	2	0.72	H283, H447
7	GO:0022626	cytosolic ribosome	cellular_component	1	1	H521
4	GO:0016020	membrane	cellular_component	17	11.57	H521, H576, H986, H1038, H1166, H1234, H283, H447, H1037, H1191, H545, H1207, H583, H865, H984, H1099, H572
7	GO:0005783	endoplasmic reticulum	cellular_component	2	2	H283, H447
7	GO:0005794	Golgi apparatus	cellular_component	4	1.94	H431, H1038, H1234, H521
7	GO:0005634	nucleus	cellular_component	6	4.08	H576, H986, H1166, H572, H580, H1174
7	GO:0044434	chloroplast part	cellular_component	4	2.92	H447, H283, H576, H572
6	GO:0009528	plastid inner membrane	cellular_component	1	0.6	H447
3	GO:0044421	extracellular region part	cellular_component	1	0.6	H543
5	GO:0005886	plasma membrane	cellular_component	9	8.36	H283, H545, H576, H1038, H1166, H1207, H1234, H447, H521
5	GO:0044455	mitochondrial membrane part	cellular_component	2	0.72	H986, H1191
5	GO:0045271	respiratory chain complex I	cellular_component	1	0.6	H1191
3	GO:0048046	apoplast	cellular_component	1	1	H1166

## Sheet: R library cellular component
Level	GO ID	Term	Type	#Seqs	Graph Score	Sequences
2	GO:0005575	cellular_component	cellular_component	70	13.57	F965, F546, F499, F1445, F1001, F947, F937, F553, F1019, F15, F1271, F508, F786, F446, F391, F938, F317, F966, F800, F719, F519, F13, F1127, F815, F225, F170, F120, F972, F896, F883, F731, F647, F573, F354, F304, F303, F279, F277, F197, F636, F637, F580, F65, F475, F
2	GO:0032991	macromolecular complex	cellular_component	15	5.64	F1445,F822, F1001, F947, F937, F553, F1019, F508, F637, F580, F65, F475, F1032, F242, F822
2	GO:0005623	cell	cellular_component	69	12.3	F965, F685, F546, F499, F1001, F947, F937, F553, F1019, F15, F1271, F508, F786, F446, F391, F938, F317, F966, F800, F719, F519, F13, F1127, F815, F225, F170, F120, F972, F896, F883, F731, F647, F573, F354, F304, F303, F279, F277, F197, F636, F637, F580, F65, F475, F1032, F
2	GO:0043226	organelle	cellular_component	50	10.56	F965, F1001, F947, F937, F553, F1019, F15, F1271, F508, F391, F938, F317, F815, F225, F170, F120, F636, F637, F580, F65, F475, F1032, F719, F519, F1127, F242, F327, F1002, F667, F1292, F647, F573, F481, F466, F462, F437, F365, F354, F341, F339, F338, F304
2	GO:0031974	membrane-enclosed lumen	cellular_component	2	0.18	F965, F580
2	GO:0005576	extracellular region	cellular_component	1	1	F503
3	GO:0043234	protein complex	cellular_component	13	8.81	F1445, F1001, F947, F937, F553, F1019, F508, F637, F580, F65, F475, F1032, F822
3	GO:0031982	vesicle	cellular_component	24	8.41	F938, F815, F647, F573, F481, F466, F462, F437, F365, F354, F341, F339, F338, F317, F304, F303, F277, F197, F185, F170, F120, F1030, F1015, F731
3	GO:0043228	non-membrane-bounded organelle	cellular_component	8	2.55	F965, F65, F475, F1032, F719, F519, F1127, F242
3	GO:0044422	organelle part	cellular_component	22	5.02	F965, F1001, F947, F937, F553, F1019, F508, F391, F815, F225, F170, F120, F637, F580, F65, F475, F1032, F667, F1292, F938, F731, F869
3	GO:0043227	membrane-bounded organelle	cellular_component	43	15.13	F965, F1001, F947, F937, F553, F1019, F15, F1271, F508, F391, F938, F317, F815, F225, F170, F120, F636, F637, F580, F327, F1002, F667, F1292, F647, F573, F481, F466, F462, F437, F365, F354, F341, F339, F338, F304, F303, F277, F197, F185, F1030, F1015, F86
3	GO:0044464	cell part	cellular_component	69	20.5	F965, F685, F546, F499, F1001, F947, F937, F553, F1019, F15, F1271, F508, F786, F446, F391, F938, F317, F966, F800, F719, F519, F13, F1127, F815, F225, F170, F120, F972, F896, F883, F731, F647, F573, F354, F304, F303, F279, F277, F197, F636, F637, F580, F65, F475, F1032, F
4	GO:0031988	membrane-bounded vesicle	cellular_component	24	14.02	F938, F815, F647, F573, F481, F466, F462, F437, F365, F354, F341, F339, F338, F317, F304, F303, F277, F197, F185, F170, F120, F1030, F1015, F731
4	GO:0030312	external encapsulating structure	cellular_component	2	0.96	F800, F965
4	GO:0031967	organelle envelope	cellular_component	7	1.25	F965, F1001, F508, F815, F225, F170, F120
4	GO:0000139	Golgi membrane	cellular_component	1	1	F391
4	GO:0005622	intracellular	cellular_component	58	9.14	F965, F546, F304,F250, F15, F1001, F947, F937, F553, F1019, F15, F1271, F508, F391, F938, F317, F966, F800, F719, F519, F13, F1127, F815, F225, F170, F120, F636, F637, F580, F65, F475, F1032, F242, F822, F327, F1002, F667, F1292, F647, F573, F481, F466, F462, F437, F365, F354,
4	GO:0031975	envelope	cellular_component	7	0.75	F965, F1001, F508, F815, F225, F170, F120
4	GO:0043233	organelle lumen	cellular_component	2	0.29	F965, F580
4	GO:0044446	intracellular organelle part	cellular_component	22	7.64	F965, F1001, F947, F937, F553, F1019, F508, F391, F815, F225, F170, F120, F637, F580, F65, F475, F1032, F667, F1292, F938, F731, F869
4	GO:0044425	membrane part	cellular_component	27	8.01	F1001, F685, F508, F786, F446, F637, F822, F65, F475, F1032, F965, F905, F896, F869, F731, F647, F573, F477, F392, F354, F304, F303, F277, F197, F1271, F1197, F1029
4	GO:0012506	vesicle membrane	cellular_component	1	0.36	F731
4	GO:0031090	organelle membrane	cellular_component	11	4.46	F1001, F508, F965, F391, F815, F225, F170, F120, F637, F938, F731
4	GO:0000267	cell fraction	cellular_component	1	0.36	F391
4	GO:0012505	endomembrane system	cellular_component	4	1.82	F391, F304, F1002, F731
4	GO:0009341	beta-galactosidase complex	cellular_component	1	1	F1445
4	GO:0044424	intracellular part	cellular_component	60	15.24	F965, F685, F822, F546, F499, F1001, F250, F304, F15, F947, F937, F553, F1019, F1271, F508, F391, F938, F317, F966, F800, F719, F519, F13, F1127, F815, F225, F170, F120, F636, F637, F580, F65, F475, F1032, F242, F822, F327, F1002, F667, F1292, F647, F573, F481, F466, F462, F437, F365, F354,
4	GO:0016020	membrane	cellular_component	37	20.19	F1001, F508, F786, F446, F965, F391, F972, F896, F883, F815, F731, F647, F573, F354, F317, F304, F303, F279, F277, F225, F197, F170, F1271, F120, F637, F822, F65, F475, F1032, F905, F869, F477, F392, F1197, F1029, F960, F938
5	GO:0005626	insoluble fraction	cellular_component	1	0.6	F391
5	GO:0043229	intracellular organelle	cellular_component	51	17.17	F965, F15, F1001, F947, F937, F553, F1019, F15, F1271, F508, F391, F938, F317, F815, F225, F170, F120, F636, F637, F580, F65, F475, F1032, F719, F519, F1127, F242, F327, F1002, F667, F1292, F647, F573, F481, F466, F462, F437, F365, F354, F341, F339, F338, F304
5	GO:0031224	intrinsic to membrane	cellular_component	19	11.4	F786, F446, F965, F905, F896, F869, F731, F647, F573, F477, F392, F354, F304, F303, F277, F197, F1271, F1197, F1029
5	GO:0045275	respiratory chain complex III	cellular_component	1	0.6	F1001
5	GO:0005618	cell wall	cellular_component	2	1.6	F800, F965
5	GO:0019898	extrinsic to membrane	cellular_component	4	0.86	F822, F65, F475, F1032
5	GO:0030964	NADH dehydrogenase complex	cellular_component	1	0.36	F508
5	GO:0019866	organelle inner membrane	cellular_component	7	2.47	F1001, F508, F965, F815, F225, F170, F120
5	GO:0044459	plasma membrane part	cellular_component	5	0.86	F822, F685, F65, F475, F1032
5	GO:0044433	cytoplasmic vesicle part	cellular_component	1	0.36	F731
5	GO:0070469	respiratory chain	cellular_component	2	0.72	F1001, F508
5	GO:0044444	cytoplasmic part	cellular_component	42	20.67	F965, F1001, F947, F937, F553, F1019, F15, F1271, F508, F391, F938, F317, F815, F225, F170, F120, F636, F637, F242, F667, F1292, F1002, F647, F573, F481, F466, F462, F437, F365, F354, F341, F339, F338, F304, F303, F277, F197, F185, F1030, F1015, F869, F73
5	GO:0000151	ubiquitin ligase complex	cellular_component	1	0.36	F822
5	GO:0030529	ribonucleoprotein complex	cellular_component	1	0.6	F242
5	GO:0005737	cytoplasm	cellular_component	49	18.4	F965, F365, F1001, F947, F937, F553, F1019, F15, F1271, F508, F391, F938, F317, F966, F800, F719, F519, F13, F1127, F815, F225, F170, F120, F636, F637, F242, F667, F1292, F1002, F647, F573, F481, F466, F462, F437, F365, F354, F341, F339, F338, F304, F303, F277,
5	GO:0016469	proton-transporting two-sector ATPase complex	cellular_component	1	0.36	F637
5	GO:0005886	plasma membrane	cellular_component	24	20.52	F972, F965, F896, F883, F815, F731, F647, F573, F391, F354, F317, F304, F303, F279, F277, F225, F197, F170, F1271, F120, F822, F65, F475, F1032
5	GO:0044455	mitochondrial membrane part	cellular_component	2	0.72	F1001, F508
5	GO:0045271	respiratory chain complex I	cellular_component	1	0.6	F508
6	GO:0016529	sarcoplasmic reticulum	cellular_component	4	4	F815, F225, F170, F120
6	GO:0005829	cytosol	cellular_component	4	4	F667, F391, F1292, F1002
6	GO:0030659	cytoplasmic vesicle membrane	cellular_component	1	0.6	F731
6	GO:0044432	endoplasmic reticulum part	cellular_component	4	2.4	F947, F937, F553, F1019
6	GO:0005840	ribosome	cellular_component	1	1	F242
6	GO:0043231	intracellular membrane-bounded organelle	cellular_component	44	23.82	F965, F304, F1001, F947, F937, F553, F1019, F15, F1271, F508, F391, F938, F317, F815, F225, F170, F120, F636, F637, F580, F327, F1002, F667, F1292, F647, F573, F481, F466, F462, F437, F365, F354, F341, F339, F338, F304, F303, F277, F197, F185, F1030, F1015, F86
6	GO:0009898	internal side of plasma membrane	cellular_component	4	1.44	F822, F65, F475, F1032
6	GO:0031234	extrinsic to internal side of plasma membrane	cellular_component	4	2.4	F822, F65, F475, F1032
6	GO:0031966	mitochondrial membrane	cellular_component	3	1.03	F1001, F508, F965
6	GO:0005747	mitochondrial respiratory chain complex I	cellular_component	1	1	F508
6	GO:0005730	nucleolus	cellular_component	1	1	F965
6	GO:0016021	integral to membrane	cellular_component	17	17	F965, F905, F896, F869, F731, F647, F573, F477, F392, F354, F304, F303, F277, F197, F1271, F1197, F1029
6	GO:0005743	mitochondrial inner membrane	cellular_component	3	1.72	F1001, F508, F965
6	GO:0016471	vacuolar proton-transporting V-type ATPase complex	cellular_component	1	1	F637
6	GO:0005750	mitochondrial respiratory chain complex III	cellular_component	1	1	F1001
6	GO:0031461	cullin-RING ubiquitin ligase complex	cellular_component	1	0.6	F822
6	GO:0044435	plastid part	cellular_component	7	3.38	F965, F815, F225, F170, F120, F667, F1292
6	GO:0043232	intracellular non-membrane-bounded organelle	cellular_component	9	4.25	F965, F65, F822, F475, F1032, F719, F519, F1127, F242
6	GO:0031410	cytoplasmic vesicle	cellular_component	25	14.02	F938, F250, F815, F647, F573, F481, F466, F462, F437, F365, F354, F341, F339, F338, F317, F304, F303, F277, F197, F185, F170, F120, F1030, F1015, F731
6	GO:0009505	plant-type cell wall	cellular_component	1	1	F800
6	GO:0009526	plastid envelope	cellular_component	5	1.46	F965, F815, F225, F170, F120
6	GO:0005624	membrane fraction	cellular_component	1	1	F391
6	GO:0005774	vacuolar membrane	cellular_component	4	3.6	F637, F965, F938, F391
6	GO:0044437	vacuolar part	cellular_component	4	2.4	F637, F965, F938, F391
6	GO:0070013	intracellular organelle lumen	cellular_component	2	0.49	F965, F580
6	GO:0033176	proton-transporting V-type ATPase complex	cellular_component	1	0.6	F637
6	GO:0016528	sarcoplasm	cellular_component	4	2.4	F815, F225, F170, F120
6	GO:0044429	mitochondrial part	cellular_component	3	0.37	F1001, F508, F965
6	GO:0044428	nuclear part	cellular_component	2	0.82	F965, F580
6	GO:0005740	mitochondrial envelope	cellular_component	3	0.62	F1001, F508, F965
6	GO:0044431	Golgi apparatus part	cellular_component	2	1.2	F391, F869
6	GO:0005654	nucleoplasm	cellular_component	1	0.36	F580
6	GO:0031225	anchored to membrane	cellular_component	2	2	F786, F446
6	GO:0019897	extrinsic to plasma membrane	cellular_component	4	1.44	F822, F65, F475, F1032
6	GO:0042170	plastid membrane	cellular_component	4	1.44	F815, F225, F170, F120
6	GO:0044430	cytoskeletal part	cellular_component	3	1.8	F65, F475, F1032
6	GO:0044451	nucleoplasm part	cellular_component	1	0.6	F580
6	GO:0009528	plastid inner membrane	cellular_component	4	2.4	F815, F225, F170, F120
7	GO:0080008	CUL4 RING ubiquitin ligase complex	cellular_component	1	1	F822
7	GO:0005746	mitochondrial respiratory chain	cellular_component	2	1.2	F1001, F508
7	GO:0005856	cytoskeleton	cellular_component	7	5.08	F65, F475, F1032, F965, F719, F519, F1127
7	GO:0005739	mitochondrion	cellular_component	5	2.22	F1001, F508, F965, F938, F317
7	GO:0031981	nuclear lumen	cellular_component	2	0.82	F965, F580
7	GO:0009532	plastid stroma	cellular_component	6	3.6	F815, F667, F225, F170, F1292, F120
7	GO:0016459	myosin complex	cellular_component	3	3	F65, F475, F1032
7	GO:0009536	plastid	cellular_component	10	4.63	F965, F15, F1271, F815, F225, F170, F120, F636, F667, F1292
7	GO:0009941	chloroplast envelope	cellular_component	5	2.44	F965, F815, F225, F170, F120
7	GO:0017177	alpha-glucosidase II complex	cellular_component	4	4	F947, F937, F553, F1019
7	GO:0005834	heterotrimeric G-protein complex	cellular_component	4	4	F822, F65, F475, F1032
7	GO:0016023	cytoplasmic membrane-bounded vesicle	cellular_component	24	23.36	F938, F815, F647, F573, F481, F466, F462, F437, F365, F354, F341, F339, F338, F317, F304, F303, F277, F197, F185, F170, F120, F1030, F1015, F731
7	GO:0009706	chloroplast inner membrane	cellular_component	4	4	F815, F225, F170, F120
7	GO:0005801	cis-Golgi network	cellular_component	1	1	F869
7	GO:0031969	chloroplast membrane	cellular_component	4	2.4	F815, F225, F170, F120
7	GO:0009507	chloroplast	cellular_component	8	4.38	F965, F815, F225, F170, F120, F636, F667, F1292
7	GO:0005773	vacuole	cellular_component	4	1.44	F637, F965, F938, F391
7	GO:0005783	endoplasmic reticulum	cellular_component	9	4.84	F947, F937, F553, F1019, F815, F225, F170, F120, F869
7	GO:0005794	Golgi apparatus	cellular_component	2	0.72	F391, F869
7	GO:0005634	nucleus	cellular_component	4	2.49	F965, F580, F327, F1002
7	GO:0044434	chloroplast part	cellular_component	7	5.64	F965, F815, F225, F170, F120, F667, F1292
8	GO:0005667	transcription factor complex	cellular_component	1	1	F580
8	GO:0030139	endocytic vesicle	cellular_component	1	0.22	F731
8	GO:0015629	actin cytoskeleton	cellular_component	3	1.8	F65, F475, F1032
8	GO:0009570	chloroplast stroma	cellular_component	6	6	F815, F667, F225, F170, F1292, F120
9	GO:0043659	symbiosome	cellular_component	1	0.36	F731
9	GO:0043661	peribacteroid membrane	cellular_component	1	1	F731
10	GO:0043660	bacteroid-containing symbiosome	cellular_component	1	0.6	F731
