# Supplementary material for: Identifying Differentially Expressed Genes in Pollen from Self-Incompatible “Wuzishatangju” and Self-Compatible “Shatangju” Mandarins
Source: MDPI journal article supplement (doi:10.3390/ijms14048538), 2013-04-17
Supplement: s1 [file s1 › Table S4.pdf]

**Table S4.** Potential pollen-pistil/pollination processes genes obtained from the F and R libraries.

| Seq. Name        | Seq. Description                                        | GenBank accession No. | Length (bp) | E-value  | Similarity | Annotation                |
|------------------|---------------------------------------------------------|-----------------------|-------------|----------|------------|---------------------------|
| <b>F library</b> |                                                         |                       |             |          |            |                           |
| H102             | Pollen coat-like protein (PCP)                          | JK724775              | 488         | 2.23E-31 | 86.55%     | Pollen development        |
| H128             | Pollen allergen Pla o1                                  | JK724777              | 526         | 1.80E-35 | 57.85%     | Extracellular space       |
| H304             | F-box protein (F-box)                                   | JK724779              | 446         | 3.04E-23 | 87.80%     | Kinase activity           |
| <b>R library</b> |                                                         |                       |             |          |            |                           |
| F65              | F-box and wd40 domain protein                           | JK724786              | 339         | 6.79E-52 | 82.15%     | G-protein complex         |
| F78              | Self-incompatibility S1 family protein (S1)             | JK724787              | 252         | 1.38E-09 | 62.83%     | Pollen-pistil interaction |
| F960             | Sexual differentiation process protein isp4-like (SDPP) | JK724788              | 840         | 7.23E-67 | 83.80%     | Transporter activity      |
| F499             | Anther-specific protein LAT52 precursor                 | JK724793              | 181         | 1.67E-06 | 70.80%     | Extracellular space       |
| F546             | Pollen allergen Che a 1 precursor                       | JK724795              | 260         | 1.67E-14 | 64.50%     | Extracellular space       |
| F685             | Auxin-repressed protein                                 | JK724798              | 595         | 1.18E-09 | 61.67%     | Signal transduction       |
