# Supplementary material for: Identifying Differentially Expressed Genes in Pollen from Self-Incompatible “Wuzishatangju” and Self-Compatible “Shatangju” Mandarins
Source: MDPI journal article supplement (doi:10.3390/ijms14048538), 2013-04-17
Supplement: s1 [file s1 › Table S5.pdf]

**Table S5.** Primers and PCR procedures used for SqRT-PCR and qPCR.

| Primer name | Primer sequences (5'-3') | Procedure for SqRT-PCR                | Procedure for qPCR             |
|-------------|--------------------------|---------------------------------------|--------------------------------|
| H102-F      | GAAGAAGAACACAGAAACAC     | 94 °C, 4 min; 94 °C 30 s, 56 °C 30 s, | 95°C, 1 min; 95°C, 10 s, 56°C  |
| H102-R      | TGCTGCTCAATCTGCTAAAG     | 72 °C 60 s, 30 cycles; 72 °C 10 min   | 15 s, 72°C 35 s, 40 cycles     |
| H115-F      | TCAAGAATCTCCATTTGTGTA    | 94 °C, 4 min; 94 °C 30 s, 57 °C 30 s, | 95°C, 1 min; 95°C, 10 s, 57°C, |
| H115-R      | GCAGGTGGCTTTGAGGTAGAT    | 72 °C 60 s, 30 cycles; 72 °C 10 min   | 15 s, 72°C, 35 s, 40 cycles    |
| H128-F      | ATGCTTTGCCAGCCAAGAGAT    | 94 °C, 4 min; 94 °C 30 s, 60 °C 30 s, | 95°C, 1 min; 95°C, 10 s, 60°C  |
| H128-R      | AAGAATCCTGCGAAGATGGTT    | 72 °C 60 s, 30 cycles; 72 °C 10 min   | 15 s, 72°C 35 s, 40 cycles     |
| H264-F      | GGCACTGCCCCCTCTTTTGGGA   | 94 °C, 4 min; 94 °C 30s, 61 °C 30 s,  | 95°C, 1 min; 95°C, 10 s, 61°C  |
| H264-R      | AATCAAACGAGCTTTTACCCT    | 72 °C 60 s, 30 cycles; 72 °C 10 min   | 15 s, 72°C 35 s, 40 cycles     |
| H304-F      | CCAAGCATAAGCCCTCCCCAT    | 94 °C, 4 min; 94 °C 30 s, 62 °C 30 s, | 95°C, 1 min; 95°C, 10 s, 62°C  |
| H304-R      | CCACAGTGCCACGATTTGATG    | 72 °C 60 s, 30 cycles; 72 °C 10 min   | 15 s, 72°C 35 s, 40 cycles     |
| H428-F      | GGAAGTAAAAGCAAAGCGGA     | 94 °C, 4 min; 94 °C 30 s, 60°C 30 s,  | 95°C, 1 min; 95°C, 10 s, 60°C  |
| H428-R      | ATAGACGGCGTAGCGGCACT     | 72 °C 60 s, 30 cycles; 72 °C 10 min   | 15 s, 72°C 35 s, 40 cycles     |
| H543-F      | CTCGGCACTTGATGAAAGAATA   | 94°C, 4 min; 94°C 30s, 59°C 30s,      | 95°C, 1 min; 95°C, 10 s, 59°C  |
| H543-R      | AGTGTGAAGTCCATCAAAAAAG   | 72°C 60 s, 30 cycles; 72°C 10 min     | 15 s, 72°C 35 s, 40 cycles     |
| H556-F      | TTATGGCTTTGTCTTGTGTC     | 94 °C, 4 min; 94 °C 30 s, 58 °C 30 s, | 95°C, 1 min; 95°C, 10 s, 58°C  |
| H556-R      | TGGTCTCTTACTTGTAGCCT     | 72°C 60 s, 30 cycles; 72 °C 10 min    | 15 s, 72°C 35 s, 40 cycles     |
| H858-F      | CTTCCCACTCACTCTCCACT     | 94 °C, 4 min; 94 °C 30 s, 62 °C 30 s, | 95°C, 1 min; 95°C, 10 s, 62°C  |
| H858-R      | TGGTCTCCACCCATTGTCCT     | 72 °C 60 s, 30 cycles; 72 °C 10 min   | 15 s, 72°C 35 s, 40 cycles     |
| H1065-F     | GTAGGGTTGATACATATAGAG    | 94 °C, 4 min; 94 °C 30 s, 55 °C 30 s, | 95°C, 1 min; 95°C, 10 s, 55°C  |
| H1065-R     | ATCAACAAGACGACGATCCTG    | 72 °C 60 s, 30 cycles; 72 °C 10 min   | 15 s, 72°C 35 s, 40 cycles     |
| H1092-F     | ACAGGTAGCATAATCAGTTTG    | 94 °C, 4 min; 94 °C 30s, 60 °C 30 s,  | 95°C, 1 min; 95°C, 10 s, 60°C  |
| H1092-R     | CTTTGGTGCCTTTGTGAGCCGT   | 72 °C 60 s, 30 cycles; 72 °C 10 min   | 15 s, 72°C 35 s, 40 cycles     |
| F15-F       | CTGGAAAGTCAAAAAGGAGAAGT  | 94 °C, 4 min; 94 °C 30 s, 61 °C 30 s, | 95°C, 1 min; 95°C, 10 s, 61°C  |
| F15-R       | GAGACAGCGGGGAGTCGTTAC    | 72 °C 60 s, 30 cycles; 72 °C 10 min   | 15 s, 72°C 35 s, 40 cycles     |
| F65-F       | TGTCTCGCGGCTGCAGGGAAAT   | 94 °C, 4 min; 94 °C 30 s, 60 °C 30 s, | 95°C, 1 min; 95°C, 10 s, 60°C  |
| F65-R       | ACGATCCTCCTCAACAGCCAAG   | 72 °C 60 s, 30 cycles; 72 °C 10 min   | 15 s, 72°C 35 s, 40 cycles     |
| F78-F       | TCCCGTGTCTTTAAACATGAG    | 94 °C, 4 min; 94 °C 30 s, 61°C 30 s,  | 95°C, 1 min; 95°C, 10 s, 61°C  |
| F78-R       | TTGGTTGACACACCGTGGGCAT   | 72 °C 60 s, 30 cycles; 72 °C 10 min   | 15 s, 72°C 35 s, 40 cycles     |
| F960-F      | ACGGCTTTAGCGGTCGGCAT     | 94 °C, 4 min; 94 °C 30 s, 62 °C 30 s, | 95°C, 1 min; 95°C, 10 s, 62°C  |
| F960-R      | TGGGGTGTATTGGTCCTGG      | 72 °C 60 s, 30 cycles; 72 °C 10 min   | 15 s, 72°C 35 s, 40 cycles     |
| F966-F      | CCACTTCAATGATTGTTCTTC    | 94 °C, 4 min; 94 °C 30 s, 58 °C 30 s, | 95°C, 1 min; 95°C, 10 s, 58°C  |
| F966-R      | ATTGCATGATGCCAACATTGAG   | 72 °C 60 s, 30 cycles; 72 °C 10 min   | 15 s, 72°C 35 s, 40 cycles     |
| F1166-F     | TTATGACCTTCAAGTCGACCTC   | 94 °C, 4 min; 94 °C 30 s, 60 °C 30 s, | 95°C, 1 min; 95°C, 10 s, 60°C  |
| F1166-R     | GCCACAGTTCAGTGCTTAGTCC   | 72 °C 60 s, 30 cycles; 72 °C 10 min   | 15 s, 72°C 35 s, 40 cycles     |
| F250-F      | ACAACAAGATTTCGAGGATG     | 94 °C, 4 min; 94 °C 30 s, 57 °C 30 s, | 95°C, 1 min; 95°C, 10 s, 57°C  |
| F250-R      | GAATAAATGAGTCTTTGTCC     | 72 °C 60 s, 30 cycles; 72 °C 10 min   | 15 s, 72°C 35 s, 40 cycles     |
| F465-F      | GAAAAATAACAACCCGTGAAA    | 94 °C, 4 min; 94 °C 30 s, 61 °C 30 s, | 95°C, 1 min; 95°C, 10 s, 61°C  |
| F465-R      | GGGAATCTGATGAAATGGATGAA  | 72 °C 60 s, 30 cycles; 72 °C 10 min   | 15 s, 72°C 35 s, 40 cycles     |
| F449-F      | CGAGTCACAATACACCAAAC     | 94 °C, 4 min; 94 °C 30 s, 58 °C 30 s, | 95°C, 1 min; 95°C, 10 s, 58°C  |
| F449-R      | TCAATGAAGCTTGTGGCCGT     | 72 °C 60 s, 30 cycles; 72 °C 10 min   | 15 s, 72°C 35 s, 40 cycles     |
| F519-F      | ATGGAGTTGTATGTGGTTTC     | 94 °C, 4 min; 94 °C 30 s, 57 °C 30 s, | 95°C, 1 min; 95°C, 10 s, 57°C  |
| F519-R      | TGCAGTTGAGAAGAGCTATG     | 72 °C 60 s, 30 cycles; 72 °C 10 min   | 15 s, 72°C 35 s, 40 cycles     |
| F546-F      | ACACAACTTCCCCGCCCTCACT   | 94 °C, 4 min; 94 °C 30 s, 60 °C 30 s, | 95°C, 1 min; 95°C, 10 s, 60°C  |
| F546-R      | CTCTATGCTTCACCTCCCTCCT   | 72 °C 60 s, 30 cycles; 72 °C 10 min   | 15 s, 72°C 35 s, 40 cycles     |

**Table S5. Cont.**

| <b>Primer name</b> | <b>Primer sequences (5'-3')</b> | <b>Procedure for SqRT-PCR</b>         | <b>Procedure for qPCR</b>     |
|--------------------|---------------------------------|---------------------------------------|-------------------------------|
| F1019-F            | CAAACCTGTCCACTCCTTTCATTC        | 94 °C, 4 min; 94 °C 30 s, 60 °C 30 s, | 95°C, 1 min; 95°C, 10 s, 60°C |
| F1019-R            | TTGATCACTCCATAGTTGAAAGC         | 72 °C 60 s, 30 cycles; 72 °C 10 min   | 15 s, 72°C 35 s, 40 cycles    |
| F580-F             | CGATCGTCAATCTCAACAAGCT          | 94 °C, 4 min; 94 °C 30 s, 60 °C 30 s, | 95°C, 1 min; 95°C, 10 s, 60°C |
| F580-R             | GTAATGGCAATCAACCAAAGGA          | 72 °C 60 s, 30 cycles; 72 °C 10 min   | 15 s, 72°C 35 s, 40 cycles    |
| F685-F             | TTCTCCTTCCGGGTCTTGCAG           | 94 °C, 4 min; 94 °C 30 s, 59 °C 30 s, | 95°C, 1 min; 95°C, 10 s, 59°C |
| F685-R             | CAAAATCGTCACTTATTCCTC           | 72 °C 60 s, 30 cycles; 72 °C 10 min   | 15 s, 72°C 35 s, 40 cycles    |
| F822-F             | TTTCACACATCTTCTGACGAC           | 94 °C, 4 min; 94 °C 30 s, 59 °C 30 s, | 95°C, 1 min; 95°C, 10 s, 59°C |
| F822-R             | TGTTGATGGGGCTTACTTGGT           | 72 °C 60 s, 30 cycles; 72 °C 10 min   | 15 s, 72°C 35 s, 40 cycles    |
